# 1 CDC50 orthologues in *Plasmodium falciparum* have distinct 2 roles in merozoite egress and trophozoite maturation

3  
4 Avnish Patel<sup>1</sup>, Stephanie D. Nofal<sup>1</sup>, Michael J. Blackman<sup>2</sup> and David A. Baker<sup>1</sup>

5 1. Department of Infection Biology, London School of Hygiene & Tropical Medicine, London,  
6 United Kingdom

7 2. Malaria Biochemistry Laboratory, The Francis Crick Institute, London, United Kingdom and  
8 Department of Infection Biology, London School of Hygiene & Tropical Medicine, London,  
9 United Kingdom.

10

## 11 **Abstract**

12 In model organisms P4-ATPases require cell division control protein 50 (CDC50) chaperones for  
13 their phospholipid flipping activity. In the malaria parasite, *P. falciparum*, guanylyl cyclase alpha  
14 (GC $\alpha$ ) is an integral membrane protein that is essential for release (egress) of merozoites from  
15 their host erythrocytes. GC $\alpha$  is unusual in that it contains both a C-terminal cyclase domain and  
16 an N-terminal P4-ATPase domain of unknown function. We sought to investigate whether any  
17 of the three CDC50 orthologues (denoted A, B and C) encoded by *P. falciparum* are required for  
18 GC $\alpha$  function. Using gene tagging and conditional gene disruption, we demonstrate that both

19 CDC50B and CDC50C are expressed in the clinically important asexual blood stages and that  
20 CDC50B is a binding partner of GC $\alpha$  whereas CDC50C is the binding partner of another putative  
21 P4-ATPase, ATP2. Our findings indicate that CDC50B has no essential role for intraerythrocytic  
22 parasite maturation but modulates the rate of parasite egress by interacting with GC $\alpha$  for  
23 optimal cGMP synthesis. In contrast, CDC50C is essential for blood stage trophozoite  
24 maturation. Additionally, we find that the CDC50C-ATP2 complex may influence parasite  
25 endocytosis of host cell haemoglobin and consequently hemozoin formation.

26

## 27 **Introduction**

28 *Plasmodium falciparum* is responsible for the majority of malaria mortality and morbidity  
29 globally. Whilst there was a sharp reduction in malaria-related deaths between 2000 and 2014  
30 due to increased surveillance, improved control measures and the use of highly effective drug  
31 treatments, the decline in cases has halted in recent years. This is thought to be due to the  
32 emergence of resistance to insecticides in the *Anopheles* mosquito vector, and to the  
33 appearance of parasites resistant to artemisinin combination therapies (ACTs) (1). Given this  
34 trend, novel targets must be explored to generate candidates for the drug development  
35 pipeline to prevent a future increase in disease burden should the ACTs fail (2).

36 *P. falciparum* has a complex life cycle, characterised by multiple specialised developmental  
37 forms which transition between the mosquito vector and humans (3). Malaria pathology is  
38 caused exclusively by the asexual blood stage of the life cycle. Briefly, extracellular merozoites

39 invade host erythrocytes and transform into ring stages for around 24 h. These develop within a  
40 membrane-enclosed parasitophorous vacuole to form trophozoites which digest host cell  
41 haemoglobin and initiate DNA replication and endomitosis. The resulting schizonts undergo  
42 cytokinesis (segmentation) only upon maturation, forming daughter merozoites which are  
43 released from the host cell through a highly regulated egress process. The cycle is then re-  
44 initiated by the invasion of fresh erythrocytes by the newly released merozoites. A detailed  
45 molecular understanding of the biochemical pathways and proteins essential for blood-stage  
46 development will inform discovery of novel targeted therapeutics that prevent malaria  
47 pathogenesis.

48 Merozoite egress and invasion are regulated by cyclic nucleotide signalling, conserved elements  
49 of which regulate multiple aspects of cell biology in model organisms and across the animal  
50 kingdom and can be effectively targeted pharmacologically (4). The second messengers cyclic  
51 adenosine monophosphate (cAMP) and cyclic guanosine monophosphate (cGMP), are  
52 produced by cyclase enzymes and activate their respective cyclic nucleotide-dependent effector  
53 protein kinases PKA and PKG in a concentration-dependent manner (5). The activated kinases  
54 phosphorylate downstream targets which carry out effector functions and the cyclic nucleotide  
55 signals are then broken down by phosphodiesterases (6, 7). *P. falciparum* uses cyclic nucleotide  
56 signalling throughout its complex life cycle (7). Notably, cGMP signalling is required for egress  
57 of asexual blood stage merozoites (8, 9) but also egress of gametes (10) and liver stage  
58 parasites (11, 12) as well as for ookinete and sporozoite motility (12–14). In contrast, cAMP  
59 signalling has been shown to be required for sporozoite apical organelle secretion and invasion  
60 of hepatocytes (15), gametocyte deformability (16) and erythrocyte invasion (17).

61 *P. falciparum* has two guanylyl cyclases. Whilst guanylyl cyclase beta (GC $\beta$ ) is dispensable in  
62 blood stages (9), guanylyl cyclase alpha (GC $\alpha$ ) synthesises cGMP in mature blood stage  
63 schizonts, where it plays an essential role in activating PKG to trigger egress (18). Both of the  
64 malaria parasite GCs are large integral membrane proteins with 22 predicted transmembrane  
65 domains (TMDs), the C-terminal segment of which constitutes the paired C1 and C2 guanylyl  
66 cyclase catalytic domains. Uniquely for cyclase enzymes, *Plasmodium* GCs (along with  
67 apicomplexan and ciliate orthologues) also contain an N-terminal Type IV P-type ATPase (P4-  
68 ATPase)-like domain (18–20). In other organisms P4-ATPases transport phospholipids from the  
69 outer to the inner leaflet of a lipid bilayer, maintaining lipid asymmetry required for numerous  
70 functions including membrane remodeling and vesicle formation (21). Recent studies in the  
71 apicomplexan parasite *Toxoplasma* indicate that this domain is critical to the role of its single  
72 guanylyl cyclase TgGC in lytic growth, where it is essential for host cell attachment, invasion and  
73 motility-dependent egress of tachyzoites (22–25).

74 In model organisms, P4-ATPases require cell division control protein 50 (CDC50) chaperones for  
75 their phospholipid flipping activity (26, 27). CDC50 proteins are integral membrane proteins  
76 with two TMDs (28, 29). Studies in yeast have shown that CDC50 binding partners are required  
77 for the auto-phosphorylation of the catalytically active aspartic acid residue of the P4-ATPase,  
78 which is necessary for completion of the phospholipid flipping reaction cycle (30, 31). *P.*  
79 *falciparum* encodes three putative CDC50 proteins, termed CDC50A (PF3D7\_0719500), CDC50B  
80 (PF3D7\_1133300) and CDC50C (PF3D7\_1029400). Previous work in the mouse malaria model *P.*  
81 *yoelii* has shown that CDC50A binds to GC $\beta$  and is required for ookinete motility (20). Similarly,  
82 TgGC controls egress of tachyzoites (22, 24, 25) and binds to a *Toxoplasma* CDC50 partner

83 which is required for its function (22). However, the functions of *P. falciparum* CDC50  
84 orthologues have not been examined. Here we show that both CDC50B and CDC50C are  
85 expressed in the asexual blood stages and that CDC50B interacts with G $\alpha$  whereas CDC50C is  
86 the binding partner of another putative P4-ATPase (ATPase2; PF3D7\_1219600). We show that  
87 CDC50B modulates the efficiency of parasite egress by interacting with G $\alpha$  for optimal cGMP  
88 synthesis. In contrast, CDC50C is essential for asexual blood stage trophozoite maturation due  
89 to a crucial role in endocytosis of host erythrocyte haemoglobin.

90

## 91 **Results**

### 92 **1) Generation of genetic tools to investigate the function of the *P. falciparum* CDC50s**

93 To assess the biological functions of CDC50A, B and C in *P. falciparum* blood stages, we  
94 generated three transgenic parasite lines designed to allow investigation of subcellular location  
95 and the effects of conditional disruption of each CDC50. The transgenics were generated in the  
96 genetic background of a 3D7 *P. falciparum* line that stably expresses dimerisable Cre (DiCre),  
97 the Cre-recombinase activity of which is induced in the presence of rapamycin (RAP) (32, 33). In  
98 each case, the target genes were ‘floxed’ such that treatment with RAP would lead to excision  
99 of DNA sequences encoding a C-terminal region containing the second TMD of each protein (Fig  
100 1 A and B); this TMD has been shown in model organism CDC50-ATPase structures to interact  
101 with the C-terminal helix of the ATPase binding partner (28, 29). The constructs were designed

102 so that following homologous recombination, the genes were also modified by fusion to  
103 sequences encoding a C-terminal triple hemagglutinin (HA) epitope tag.

104 Successful modification of the target genes was verified by PCR (Fig 1C), and expression and  
105 RAP-induced excision of tagged CDC50A-HA, CDC50B-HA and CDC50C-HA fragments in the  
106 respective transgenic parasites (termed CDC50A-HA:loxP, CDC50C-HA:loxP and CDC50B-  
107 HA:loxP) was confirmed by western blot (Fig 1D). Immunofluorescence analysis (IFA) of the  
108 transgenic lines (Fig 1E) revealed a diffuse, partly peripheral signal in individual merozoites  
109 within mature segmented schizonts for both CDC50B-HA and CDC50C-HA. This was similar to  
110 the pattern observed upon co-staining with the plasma membrane marker, merozoite surface  
111 protein 1 (MSP1). Whilst successful tagging and floxing of the *CDC50A* gene was also confirmed  
112 by PCR and Sanger sequencing, no protein expression could be detected in asexual blood  
113 stages. This suggested that CDC50A is not expressed in asexual stages, consistent with findings  
114 in *P. yoelii* where it is expressed only in gametocyte and mosquito stages (20). Alternatively,  
115 since *P. falciparum* transcriptomic data indicates that the *CDC50A* gene is transcribed in  
116 schizont stages (34), the protein may be expressed but rapidly degraded as its GC $\beta$  binding  
117 partner is not present in asexual blood stages (9, 19).

118

## 119 **2) Of the three isoforms, only CDC50C is essential for blood stage parasite growth**

120 To investigate the essentiality of CDC50A, CDC50B and CDC50C, highly synchronised ring-stage  
121 cultures of each DiCre transgenic line were treated with RAP to induce excision of the sequence  
122 encoding the C-terminal TMD of each protein (Fig 1C), and parasite replication assessed using

123 flow cytometry (Fig 3A). RAP-treated CDC50A-HA:loxP and CDC50B-HA:loxP parasites displayed  
124 no significant growth inhibition over three cycles compared to matched control (DMSO-treated)  
125 parasites (Fig 2A). In contrast, CDC50C-HA:loxP parasites underwent complete growth arrest  
126 after cycle 1. Examination of the parasites by Giemsa-staining showed that whilst new rings  
127 went on to form schizonts in DMSO-treated WT parasites, RAP-treated CDC50C-HA:loxP rings  
128 did not develop beyond the early trophozoite stage and eventually collapsed into small  
129 vacuoles (Fig 2B). It was concluded that CDC50C is essential for asexual blood stage survival.

130

### 131 **3) CDC50B and CDC50C bind to distinct parasite flippase partners**

132 In other organisms, CDC50 proteins interact with their cognate P4-ATPases and are required for  
133 their activity (28–31). To determine whether CDC50B and CDC50C interact with P4-ATPases in  
134 *P. falciparum* blood stage development we performed immuno-precipitation (IP) experiments  
135 from extracts of highly synchronised CDC50B-HA:loxP and CDC50C-HA:loxP schizonts. Western  
136 blot analysis confirmed the expected enrichment of the HA-tagged proteins from schizont  
137 lysates (Fig 3A). The immuno-precipitated material was then analysed by mass spectrometry in  
138 comparison with mock IP samples to confirm this and identify co-precipitating protein species.  
139 This confirmed high levels of enrichment of the HA-tagged CDC50 bait proteins (Fig 3B). In  
140 addition, in the case of the CDC50B experiments we detected a  $>9 \log_2$  enrichment of peptides  
141 derived from GC $\alpha$  (Fig 3B), whilst in the CDC50C IPs we detected  $>9 \log_2$  enrichment of peptides  
142 mapping to another putative P4-ATPase, a putative amino-phospholipid flippase  
143 PF3D7\_1219600 (ATP2) (Fig3B). No other proteins were as significantly enriched in each pull-

144 down. These results strongly suggest that CDC50B is a co-factor for GC $\alpha$  and CDC50C is a co-  
145 factor for ATP2.

146

147 **4) CDC50B is not required for GC $\alpha$  expression or trafficking, but is crucial for optimal cGMP**  
148 **synthesis required for egress**

149 GC $\alpha$  has a key role in egress, as the source of cGMP required for PKG activation (18). Having  
150 determined that CDC50B interacts with GC $\alpha$ , we next investigated whether CDC50B also has a  
151 role in parasite egress.

152 To do this, we first compared the egress kinetics of mature DMSO- and RAP-treated CDC50B-  
153 HA:loxP schizonts by monitoring the appearance in culture supernatants over time of  
154 proteolytically processed forms of the PV protein serine repeat antigen 5 (SERA5), as a proxy for  
155 egress (35). As shown in Fig 4A, this revealed a marked reduction in the rate of egress over the  
156 sampling period in RAP-treated CDC50B-HA:loxP parasites as compared to control DMSO-  
157 treated counterparts. Densitometric quantitation of data from three independent biological  
158 replicate experiments indicated that CDC50B null schizonts undergo ~50% less egress than WT  
159 controls when sampled over two hours (Fig S1). This was not due to a delay in schizont  
160 development, since Giemsa staining of DMSO- and RAP-treated CDC50B schizonts showed no  
161 detectable delay in parasite maturation, and analysis of DNA content by flow cytometry  
162 indicated no significant differences between formation of DMSO- and RAP-treated CDC50B  
163 schizonts (Fig 4A lower).



164 In *T. gondii*, the orthologue of CDC50B is required for correct subcellular trafficking of TgGC  
165 (22). To investigate whether this is also true in *P. falciparum*, we used a CRISPR-Cas9-based  
166 approach to fuse GC $\alpha$  to a C-terminal mCherry tag in the CDC50B-HA:loxP line, creating a  
167 parasite line called CDC50B-HA:loxP GC $\alpha$ -mCherry (Fig S2). We failed to detect the tagged  
168 protein directly by fluorescence microscopy, possibly due to the previously reported very low  
169 abundance of GC $\alpha$  (18). However, western blot revealed a ~250 kDa signal in schizont lysates  
170 from CDC50B-HA:loxP GC $\alpha$ -mCherry schizonts, likely representing a proteolytic fragment of the  
171 tagged protein, since GC $\alpha$  is prone to proteolytic degradation in both *P. falciparum* and *T. gondii*  
172 (18, 22) (Fig 4B). Interestingly, western blot of extracts of RAP-treated CDC50B-HA:loxP GC $\alpha$ -  
173 mCherry schizonts indicated that there was no marked reduction in the levels of GC $\alpha$  in the  
174 absence of CDC50B (Fig 4B). Exploiting the tagged GC $\alpha$ -mCherry line, we sought to confirm  
175 whether CDC50B was co-precipitated when GC $\alpha$ -mCherry was immuno-precipitated using RFP-  
176 trap beads. Co-precipitation of CDC50B was observed, confirming CDC50B binding by GC $\alpha$ -  
177 mCherry (Fig 4C).

178 To examine the role of CDC50B in trafficking of GC $\alpha$ , we used an anti-mCherry antibody to  
179 localize GC $\alpha$ -mCherry by IFA in RAP-treated CDC50B-HA:loxP GC $\alpha$ -mCherry parasites. This  
180 revealed no obvious mis-localisation of GC $\alpha$  in the absence of CDC50B, with a similar, diffuse  
181 signal detectable in both RAP- and DMSO-treated schizonts. In addition, in contrast with *T.*  
182 *gondii* (20), no mislocalisation of GC $\alpha$  in the ER or secretory pathway in the absence of CDC50B  
183 was detected, as judged by co-localisation with the ER marker plasmepsin V (PMV) (Fig 4E).  
184 Taken together, these results indicate that CDC50B binding is not important for the correct  
185 trafficking or stable expression of GC $\alpha$ . To seek more insight into the egress defect, we

186 investigated whether ablation of CDC50B resulted in changes in cyclic nucleotide levels. To do  
187 this, we assayed extracts of DMSO- and RAP-treated CDC50B-HA:loxP schizonts by ELISA to  
188 quantitate cGMP and cAMP levels. This showed that CDC50B null parasites contained 53.67%  
189 ( $\pm 12.16\%$ ) less cGMP than DMSO-treated controls, whilst no significant difference in cAMP  
190 levels was observed (Fig 4F). These reduced cGMP levels suggested that binding of CDC50B to  
191 GC $\alpha$  might be required for maximal GC $\alpha$  cyclase activity. To test this, we investigated whether  
192 the defect in egress of CDC50B null schizonts could be reversed by the addition of compounds  
193 that stimulate or mimic elevated cGMP levels. Egress was monitored in the presence and  
194 absence of the PDE inhibitor zaprinast or PET-cGMP, a membrane-permeable cGMP analogue  
195 known to activate parasite PKG (18, 36). Treatment with either compound restored egress of  
196 CDC50B null schizonts to levels similar to those observed in control CDC50B-HA:loxP schizonts,  
197 confirming the requirement of CDC50B for optimal cGMP synthesis by GC $\alpha$  (Fig 4G).

198 In view of the above results, as well as the previous observation that a lipid co-factor may  
199 stimulate egress in *Toxoplasma* and *P. falciparum* (22, 37), we examined whether the potential  
200 phospholipid flippase activity of the P4-ATPase domain of GC $\alpha$  might be modulated by CDC50B  
201 binding. To do this, we investigated whether uptake of fluorescently-labelled PS, PE and PC  
202 were affected following excision of CDC50B. DMSO- or RAP-treated CDC50B-HA:loxP late  
203 schizonts were incubated with fluorescent lipids, then analysed by flow-cytometry to determine  
204 their ability to accumulate lipids. We found no significant difference in the bulk uptake of  
205 measured lipids in schizonts in the presence or absence of CDC50B (Fig S3).

206

207 **5) CDC50C is not required for lipid uptake or protein export, but plays an essential role in**  
208 **haemoglobin uptake from the host erythrocyte.**

209 As described above, RAP treatment of synchronous, newly invaded CDC50C-HA:loxP rings  
210 produced a CDC50C null parasite population that displayed a trophozoite arrest phenotype (Fig  
211 2B), suggesting an essential role for CDC50C in the trophozoite-to-schizont transition. Given this  
212 evidence that CDC50C plays a very different role to that of CDC50B, we decided to interrogate  
213 more precisely the functional role of CDC50C. Previous transcriptomic analysis has shown that  
214 CDC50C is transcribed throughout the asexual blood stage cycle, with relatively low levels of  
215 transcription in rings increasing to a peak in mature schizont stages (34). Consistent with this  
216 transcriptional profile, immuno-staining of CDC50C-HA:loxP parasites detected expression in  
217 ring, trophozoite and schizont stages (Fig S4). Co-staining of CDC50C in trophozoites with  
218 antibodies to ERD2 (a Golgi marker), PMV (an ER marker) or EXP2 (a PVM marker) showed that  
219 CDC50C displayed a diffuse cytosolic staining with no clear subcellular localisation (Fig5A).

220 Phospholipid flippases have been shown to contribute directly to cellular lipid uptake (38–40).  
221 Initially we speculated that the growth arrest of CDC50C null trophozoites may be due to a  
222 dysregulation of lipid uptake as a result of loss of function of the putative amino-phospholipid  
223 flippase ATP2 partner. To test this notion, we labelled live RAP- and DMSO-treated CDC50C-  
224 HA:loxP trophozoites with the fluorescent amino-phospholipid analogues NBD-PC, NBD-PE and  
225 NBD-PS. No discernable difference in lipid uptake between CDC50C null and WT trophozoites  
226 was observed by microscopy (Fig 5B), suggesting that CDC50C plays no essential role in uptake  
227 of these phospholipids.

228 In model organisms, flippases also contribute to the production and maintenance of membrane  
229 asymmetry required for generation of trafficking vesicles, with specific flippases influencing  
230 exocytosis or endocytosis pathways (41–44). Given that lipid uptake was unaffected in the  
231 absence of CDC50C, we considered it plausible that the ATP2-CDC50C complex may contribute  
232 to lipid homeostasis and trafficking in an analogous manner. *P. falciparum* trophozoites re-  
233 model their intracellular environment to create new permeation pathways that enable export  
234 of a wide variety of proteins into the host RBC via exocytosis, a process which is essential for  
235 trophozoite development (45). To examine whether trophozoite death in CDC50C null parasites  
236 could be attributed to changes in protein exocytosis, control or RAP-treated CDC50C-HA:loxP  
237 ring stage parasites were allowed to develop into trophozoites then analysed by IFA to  
238 determine the localisation of skeleton binding protein (SBP), a prominent exported protein in  
239 trophozoites. Puncta of SBP, characteristic of export, were evident within the RBC cytosol in  
240 both DMSO- and RAP-treated CDC50C-HA:loxP trophozoites (Fig 6A), and quantification of  
241 these puncta indicated that there was no significant change in the levels of export of SBP in  
242 CDC50C null trophozoites (Fig 6B). This suggested that loss of CDC50C has no impact on bulk  
243 protein export during trophozoite development.

244 As protein export and possibly exocytosis of CDC50C null trophozoites was unaffected we lastly  
245 examined an essential endocytotic process. As intracellular asexual blood stage malaria  
246 parasites develop, they endocytose and digest host erythrocyte haemoglobin. A major by-  
247 product of this catabolic process is the sequestration of haem in the form of a characteristic  
248 crystalline product called haemozoin, which accumulates in the parasite digestive vacuole as  
249 large, refractile complexes that are easily visible by light microscopy. Microscopic examination

250 of Giemsa-stained thin blood films indicated that whilst CDC50C null trophozoites displayed an  
251 apparently normal morphology, the hemozoin crystals appeared smaller than those of DMSO-  
252 treated controls (Fig 6C right). To examine this in greater detail, we compared the ratio of the  
253 hemozoin crystal length to that of the parasite length in RAP- and DMSO-treated CDC50C null  
254 trophozoites. This confirmed a significantly decreased ratio in CDC50C null trophozoites (Fig  
255 6C), suggesting a CDC50C-dependent defect in haemozoin formation. To further examine this,  
256 we purified and quantified haemozoin from parallel populations of RAP- and DMSO-treated  
257 CDC50C-HA:loxP trophozoites (46). As shown in Fig 6D, this revealed ~30% less hemozoin in  
258 trophozoites lacking CDC50C. To investigate whether uptake of haemoglobin was affected in  
259 CDC50C null trophozoites, RAP- and DMSO-treated CDC50C-HA:loxP trophozoites were  
260 harvested at 36 h post invasion, released from their host cells using saponin, and levels of intra-  
261 parasite haemoglobin quantified by western blotting (Fig 6E). The results indicated that the  
262 levels of haemoglobin within CDC50C null trophozoites was significantly reduced compared  
263 with control counterparts (Fig S5). Collectively, these data support a role for CDC50C in uptake  
264 and digestion of host erythrocyte haemoglobin that is essential for parasite development.

265

## 266 **Discussion**

267 In this study we have shown that CDC50B and CDC50C proteins are expressed during asexual  
268 blood stage development, and that they each bind to different putative P4-ATPase flippases -  
269 GC $\alpha$  and ATP2 respectively - which function at different developmental stages of the asexual  
270 blood stage cycle. CDC50B is dispensable for intraerythrocytic development, as is its orthologue

271 in *P. yoelii* (20). However, we find that cGMP levels are reduced in CDC50B null parasites as well  
272 as rates of egress. This defect can be rescued by treatment of CDC50B null parasites with either  
273 the PDE inhibitor zaprinast or PET-cGMP, membrane-permeable cGMP analogue known to be  
274 capable of activating apicomplexan PKGs (18). As no growth defect was observed in CDC50B  
275 null parasites, it seems that whilst egress rates are reduced, CDC50B parasites are egress  
276 competent and do eventually egress. Collectively, our results strongly suggest that CDC50B acts  
277 to enhance cGMP synthesis by GC $\alpha$ . Recent studies in *T. gondii* have shown that the single GC  
278 (TgGC) also binds to a CDC50 designated CDC50.1 (22). In contrast to the present study,  
279 knockdown of CDC50.1 resulted in mis-localisation of TgGC and a block in egress of *T. gondii*  
280 tachyzoites (22). The egress block could be rescued by adding a PDE inhibitor, implying that in  
281 the absence of CDC50.1, TgGC remains functional but produces cGMP with reduced efficiency  
282 (20). We observed no detectable mislocalisation of *P. falciparum* GC $\alpha$  in the absence of  
283 CDC50B, with normal growth of parasites albeit with reduced egress rates, indicating  
284 differences between the genera. We speculate that this may be due to differences in the  
285 threshold levels of cGMP required to activate PKG to trigger egress in each species.

286 Importantly, our work adds to the evidence supporting a role for CDC50s and the P4-ATPase  
287 domain of apicomplexan GCs acting functionally to stimulate maximal cGMP production  
288 required for egress. By analogy with other CDC50-flippase interactions, we can deduce that this  
289 occurs through CDC50B binding to the P4-ATPase domain of GC $\alpha$ . Modulation of the activity of  
290 the C-terminal cyclase domain by the P4-ATPase may integrate a lipid-mediated trigger for  
291 egress, potentially by phosphatidic acid as shown in *T. gondii* (22) or phosphatidylcholine (PC)  
292 as recently indicated in *P. falciparum* (37). However, we did not observe changes in the bulk

293 uptake of fluorescent PC by schizonts lacking CDC50B. Recent structural examination of a  
294 human P4-ATPase:CDC50 complex has shown that CDC50 forms an intimate interaction with  
295 the TMDs of the P4-ATPase partner, with the loop domain between the two TMDs of the CDC50  
296 forming an anti-parallel beta-sheet structure that contacts the luminal side of the  
297 transmembrane loops of the P4-ATPase. Human CDC50 is glycosylated at several conserved  
298 asparagine residues, and the structure showed that interactions between CDC50 glycan  
299 moieties and P4-ATPase stabilise the functional complex (29). Intriguingly an alignment of  
300 human CDC50a and the three *P. falciparum* CDC50s indicates that Asn180, at which  
301 glycosylation has been shown to interact structurally with its partner P4-ATPase (29), is absent  
302 from CDC50B but conserved in both CDC50A and C (Fig S6). N-glycosylation has been observed  
303 in *P. falciparum* (47), but this finding raises the possibility that CDC50B may be non-  
304 glycosylated. This observation may explain the finding in *P. yoelii* that GC $\beta$  is degraded in the  
305 absence of its partner CDC50, suggesting that GC $\beta$  is highly reliant on interactions with its  
306 CDC50 partner (CDC50A) for protein stabilization (20). In contrast, in our study we observe that  
307 loss of CDC50B does not impact on expression of GC $\alpha$ , since GC $\alpha$ -mediated egress still occurs.  
308 The revelation that CDC50C is essential for intraerythrocytic maturation of asexual blood stage  
309 *P. falciparum* trophozoites and that CDC50C binds to ATP2 suggests that CDC50C plays a role  
310 critical for ATP2 function. In contrast to our findings using native parasite-derived protein  
311 preparations, a recent *in-vitro* study using recombinant protein indicated that ATP2 can bind  
312 CDC50B; however, CDC50C binding was not tested in that work as the authors could not  
313 express it (48). Our study indicates that the essential function of CDC50C cannot be  
314 complemented by CDC50B.

315 Global transposon mutagenesis data suggest that the gene encoding ATP2 is essential in *P.*  
316 *falciparum* blood stages (49) and its orthologue is refractory to targeted deletion in *P. berghei*  
317 (50). Whilst its cellular function is unknown, ATP2 has been implicated in resistance to two  
318 Medicines for Malaria Venture (MMV) ‘Malaria box’ compounds, mediated through a novel  
319 pathway involving gene copy number amplification. Functional characterisation of the  
320 mechanism by which drug resistance is achieved remains lacking (51). Interestingly, Cowell et  
321 al. observed non-synonymous mutations in genes encoding putative parasite Sec24 and Yip1  
322 proteins (classically involved in vesicular trafficking) in drug resistant parasite lines containing  
323 *ATP2* copy number variations (51). Here we found that the ATP2-CDC50C complex influences  
324 endocytosis of haemoglobin during blood stage development possibly by influencing the  
325 phospholipid makeup of the cytosome, a structure that is crucial for hemoglobin uptake (52,  
326 53), and it remains possible that other endocytic pathways may also be affected by loss of ATP2  
327 function, although these were not investigated. In yeast, different P4-ATPases contribute to  
328 distinct vesicular trafficking pathways (43, 44). It is plausible that this could be similar in *P.*  
329 *falciparum*. We speculate that copy number modulation of *ATP2* acquired during selection for  
330 drug resistance may modulate the endocytic pathway of the parasite so as to affect drug  
331 uptake, although further work is required to investigate this.

332 A recent study in *P. yoelii* has shown that the orthologue of CDC50C binds to a different P4-  
333 ATPase (ATP7) in ookinetes during parasite development within the mosquito (54). This  
334 indicates that CDC50C chaperones the activity of distinct P4-ATPases in different developmental  
335 stages of the parasite life cycle, in both mammalian and insect hosts. Consistent with this, the  
336 transcriptomic profiles of *ATP2* and *ATP7* show that they are confined to asexual and insect  
337 stages respectively. The same study demonstrated that the ATP7-CDC50C complex is required



338 for PC uptake in ookinetes and the authors suggested that this process may be required to  
339 allow mosquito midgut cell traversal, as CDC50C null or ATP7 null ookinetes could not achieve  
340 this. Intriguingly, alignment of ATP7 and ATP2 primary sequences alongside those of model P4-  
341 ATPases revealed that the 'QQ motif' involved in defining substrate specificity is replaced by QL  
342 and QV respectively (Fig S7). Given the similarity between these amino acid motifs, it is  
343 plausible that ATP2 also transports PC. Our finding that NDB-PC uptake is unaffected in CDC50C  
344 null trophozoites suggests that either ATP2 transports another phospholipid or that lipid uptake  
345 in trophozoites occurs via (multiple) redundant pathways. During the preparation of this  
346 manuscript, a recent pre-print has found that the *T. gondii* orthologue of CDC50C, CDC50.4,  
347 binds ATP2B an essential P4-ATPase that transports PS (55). This CDC50.4-ATP2B complex is  
348 required for efficient microneme secretion of tachyzoites with no defect observed during  
349 parasite intracellular development (55). It is plausible the *P. falciparum* CDC50C-ATP2 complex  
350 may perform a similar role in egressed merozoites, however, this was not addressed in our  
351 study due to the block of intra-erythrocyte development in CDC50C null parasites. Our work  
352 provides substantial new insights into the multifaceted, essential roles played by CDC50C  
353 proteins in malaria parasites and highlights potential species-specific divergences in the role of  
354 CDC50s in Apicomplexa.

355

## 356 **Materials and methods**

### 357 ***P. falciparum* culture and synchronisation**

358 *P. falciparum* erythrocytic stages were cultured in human erythrocytes (National Blood  
359 Transfusion Service, UK) and RPMI 1640 medium (Life Technologies) supplemented with 0.5%  
360 Albumax type II (Gibco), 50  $\mu$ M hypoxanthine, and 2 mM L-glutamine. Synchronous parasite  
361 cultures were obtained as described previously (56). Briefly, late segmented schizonts were  
362 enriched by centrifugation on a 60% Percoll (GE Healthcare) cushion, followed by the addition

363 of fresh erythrocytes to allow invasion for 1–2 h under continuously shaking conditions.  
364 Remaining schizonts were then removed by sorbitol treatment to yield highly synchronous ring-  
365 stage cultures. In all cases, induction of DiCre activity when required was by treatment for 2–4 h  
366 with 100 nM RAP (Sigma) as described previously (32, 57). Control parasites were treated with  
367 vehicle only (1% v/v DMSO).

368

### 369 **Genetic modification of *P. falciparum* parasites**

370 The CDC50A-HA:loxP, CDC50B-HA:loxP and CDC50C-HA:loxP lines were generated from the  
371 DiCre-expressing 3D7 (33) *P. falciparum* clone using SLI of a plasmid containing a SERA2loxPint  
372 (57) followed by a triple-HA tag and an in frame *Thosea asigna* virus 2A (T2A) ribosomal skip  
373 peptide and NeoR cassette with a downstream loxP and PbDT 3'UTR sequences as described  
374 previously. Re-codonised versions of the C-terminal portion of each gene containing the last  
375 transmembrane helix were synthesised commercially (IDT) and inserted downstream of the  
376 SERA2loxPint and upstream of the 3×HA tag. Sequences as follows: CDC50A –  
377 GATTTCTGGCTCATGAACGAAAAGTACAAGAACGCATTAACATGAACAATGAGAACGGTTACGGTGAC  
378 GAAAACAGTCACTTCATAGTTTGGATGAAGACTGCAGCTTTGAGTGAATTTAGAAAGAAGTACGCAAAG  
379 ATTAACGTAGAGGTAACTTGCCTATTTACGTTAACATAAACAACAACCTTCCCAGTCACCAAGTTCAACG  
380 GAAAGAAGTTCTTCGTAATCGCAGAGGGTAGTATTTTCATTAACGAGAAGATTCAGTCTCTCGGTATTCT  
381 CTATTTGGTTATAGGTATAATTAGTCTAGGTATAGTTGCATGCCTTATTTACAACCAGATGAAGAATCCG  
382 AGGATAATTGGATATCACGCTTATATTACATCTTCTTCTTCTTGG; CDC50B –  
383 GATCACATTTACTTTTGGATGGAGCCTGATATTCAGTACGAGCGTTTGCAGGAGAACAAGGAGACTAAC

384 GAGAAATTGCTAGTTTTGCCTCAGACTTTGAAGTACAACCAGGCTGGTAAGGCAATTGAGAATTCTCACT  
385 TCATAAACTGGATGATTCCTAGTGCTCTAAACTACATAAAGCGATTGTACGGAAAGTTGTACATTCCATT  
386 GAAGTTCCCCTTCTACATCTACATTGAGAACAACCTTCAAGATAAACGACACTAAGATAATCGTAATATCT  
387 ACATCTCAGTACTACATGAGGACCTTCTTGATCGGCTTTATATTCATCATCATAAGTATCATTGCATTGAT  
388 CTTGTGCATCTTCTACCTCATCAGGATGAACAAGTACGAGAACAAG; CDC50C –  
389 GATGAGTGGAACGCTAAGAAAAGTTTCCAGCTTGTGAGTCTTCGTTCTATTGGTAACTCAAGTTTCAAGT  
390 TAGCCTACGCATTCTTTCTTTTAAGTTTGTGTATTTTCATCATGATTATATTCATATTGGTTTTGGTGAAGT  
391 GCAAGTACTATAAATTGGGTAAGACTCTTACATACTGTAAGTTATCTATGAACAAGAACATTGAGAAGAT  
392 GAACTCAAGGAAGAAGACTAACATTCAGAACATTAACAAGAAAATAAACAGTATGCAGCTTGAGATAAT  
393 GCATAAAGCCTCATCAGATCCTAACAATCTTGCTGGTGCTGACCACAGTCAGAAGTTGTGTTTCTGTCCA  
394 TTGCATG. An 800-bp 5' homology region comprising the native gene sequence upstream of the  
395 re-codonised region was cloned upstream of the SERA2loxPint. Following transfection of  
396 purified schizonts using an AMAXA nucleofector 4D (Lonza) and P3 reagent, modified parasites  
397 were selected as described previously (58).

398

399 Oligonucleotide primers used in diagnostic PCR to detect integration and excision of  
400 transgenes, and the sequences of re-codonised regions, are provided below in Tables 1 and 2.  
401 CDC50B-HA:loxP GC $\alpha$ -mCherry was generated by transfection of CDC05B-HA:loxP. A linearised  
402 donor DNA which inserted mCherry in-frame with the C-terminus of GC $\alpha$  followed by a T2A  
403 peptide and BSD selection marker when integrated, and three pDC2-based (33) Cas9 gRNA  
404 plasmids were co-transfected, each with different sgRNA targeting the C-terminus of GC $\alpha$ .

405 sgRNA sequences as follows: sgRNA1 CTCTAAATTATTACAAAATA, sgRNA 2  
406 AGAAAAAACATTCAAGTATC, sgRNA 3 ACGATGAAAAAAGAAGAAG. Parasites were left to grow  
407 for two days post transfection followed by treatment with 5 µg/ml BSD to select for integrants.  
408 After the emergence of BSD resistant parasites gDNA was screened for correct integration.  
409 Donor sequences were constructed by amplifying a T2A BSD sequence from pDCIn (DiCre  
410 induction) (17) by PCR and cloning using a BsrGI site in frame with the C-terminus of a donor  
411 DNA targeting GCα which had previously been constructed in the lab (18).

412

#### 413 **Parasite sample preparation and western blot**

414 Parasite culture supernatant samples for egress and adhesin shedding assays were prepared  
415 from tightly synchronised cultures as previously described ref. Percoll-purified mature schizonts  
416 were resuspended in complete medium and allowed to further mature for 3 h until  
417 predominantly mature segmented schizonts. The experiment was then initiated by washing  
418 parasites with RPMI three times followed by final re-suspension at a 10% haematocrit in fresh  
419 warm RPMI medium. Culture supernatant aliquots (100 µL) were harvested at specified time  
420 points by centrifugation. The schizont pellet from t = 0 was retained as a pellet control sample.

421

422 Parasite extracts were prepared from Percoll-purified schizonts treated with 0.15% w/v saponin  
423 to remove erythrocyte material. To solubilise parasite proteins, PBS-washed saponin-treated  
424 parasite pellets were resuspended in three volumes of NP-40 extraction buffer (10 mM Tris, 150  
425 mM NaCl, 0.5 mM EDTA, 1% NP40, pH 7.5, with 1× protease inhibitors (Roche). Samples were

426 gently vortexed and incubated on ice for 10 min followed by centrifugation at 12,000g for 10  
427 min at 4°C. For western blot, SDS-solubilised proteins were electrophoresed on 4%-15% Mini-  
428 PROTEAN TGX Stain-Free Protein Gels (Bio-Rad) under reducing conditions and proteins  
429 transferred to nitrocellulose membranes using a semidry Trans-Blot Turbo Transfer System  
430 (Bio-Rad). Antibody reactions were carried out in 1% skimmed milk in PBS with 0.1% Tween-20  
431 and washed in PBS with 0.1% Tween-20. Appropriate horseradish peroxide-conjugated  
432 secondary antibodies were used, and antibody-bound washed membranes were incubated with  
433 Clarity Western ECL substrate (Bio-Rad) and visualised using a ChemiDoc (Bio-Rad).

434

435 Antibodies used for western blots presented in this work were as follows: anti-HA monoclonal  
436 antibody (mAb) 3F10 (diluted 1:2,000) (Roche); mouse anti-GAPDH mAb (1:20,000); rabbit anti-  
437 SERA5 polyclonal antibody (1:2,000); rabbit anti-mCherry (1:2000) (Abcam); rabbit anti-  
438 haemoglobin polyclonal antibody (1:2,000) (Sigma). Densitometry quantifications were  
439 performed using ImageJ.

440

#### 441 **Immunofluorescence assays**

442 Thin blood films were fixed with 4% formaldehyde in PBS and permeabilised with PBS  
443 containing 0.1% (v/v) Triton X-100. Blocking and antibody binding was performed in PBS 3% BSA  
444 w/v at room temperature. Slides were mounted with ProLong Gold Antifade Mountant  
445 containing DAPI (Thermo Fisher Scientific). Images were acquired with a NIKON Eclipse Ti  
446 fluorescence microscope fitted with a Hamamatsu C11440 digital camera and overlaid in ICY

447 bioimage analysis software or Image J. Super-resolution images were acquired using a Zeiss  
448 LSM880 confocal microscope with Airyscan detector in Airyscan SR mode. Antibodies used for  
449 IFA were as follows: anti-HA monoclonal antibody (mAb) 3F10 (diluted 1:200) (Roche); mouse  
450 anti-PMV mAb (1:50); rabbit anti-ERD2 polyclonal antibody (1:2,000); rabbit anti-EXP2  
451 polyclonal antibody (1:500) (Abcam); rabbit anti-mCherry polyclonal antibody (1:200) (Abcam).

452

### 453 **Flow cytometry**

454 For growth assays, synchronous ring-stage parasites were adjusted to a 0.1% parasitaemia 1%  
455 haematocrit suspension and dispensed in triplicate into six-well plates. Samples of 100  $\mu$ L were  
456 harvested at days 0, 2, 4 and 6 for each well and fixed with 4% formaldehyde 0.2%  
457 glutaraldehyde in PBS. Fixed samples were stained with SYBR green and analysed by flow  
458 cytometry.

459

### 460 **Fluorescent lipid labelling**

461 NBD-PC, NBD-PE, NBD-PS (Avanti polar lipids) were dried and re-suspended in RPMI to 1 mM  
462 stock solutions and stored at -20°C. Relevant parasite stages (trophozoites or late schizonts)  
463 from a highly synchronous cultures were pelleted and washed twice with RPMI. Parasites were  
464 then re-suspended in RPMI containing Hoechst with 1  $\mu$ M of NBD lipid or no lipid (negative  
465 control). Suspensions were incubated at 37°C for 30 minutes and subsequently pelleted by  
466 centrifugation. Pellets were then washed three times with pre-warmed RPMI containing 5%

467 BSA followed by resuspension in PBS. Suspensions were then diluted 1:10 and analysed by flow  
468 cytometry on an Attune NxT. Samples were gated for Hoechst DNA positivity and the resultant  
469 population gated for NBD lipid fluorescence. For trophozoite samples a low Hoechst signal  
470 population was gated, and for schizont samples a high Hoechst signal population.

471

## 472 **Immuno-precipitation**

473 Tightly synchronised schizonts (~45 h old) of CDC50B-HA:loxP, CDC50B-HA:loxP GC $\alpha$ -mCherry,  
474 CDC50C-HA:loxP and 3D7DiCre parental parasites were enriched on a 70% Percoll cushion. The  
475 schizonts were treated for 3 h with 1  $\mu$ M C2 (to arrest egress) after which the cultures were  
476 treated with 0.15% saponin in PBS containing cOComplete Mini EDTA-free Protease and PhosSTOP  
477 Phosphatase inhibitor cocktails (both Roche) for 10 min at 4°C to lyse the host erythrocytes.  
478 Samples were washed twice in PBS containing protease and phosphatase inhibitors, snap-  
479 frozen and pellets stored at -80°C. Parasite pellets (70-100  $\mu$ l packed volume) were  
480 resuspended in three volumes of NP-40 extraction buffer (10 mM Tris, 150 mM NaCl, 0.5 mM  
481 EDTA, 1% NP40, pH 7.5, with 1 $\times$  protease inhibitors (Roche). Samples were gently vortexed and  
482 incubated on ice for 10 min followed by centrifugation at 12,000g for 10 min at 4°C. Clarified  
483 lysates were then added to anti-HA antibody conjugated magnetic beads (Thermo Scientific) or  
484 RFP trap beads (Chromotek) which had been equilibrated in NP-40 extraction buffer. Samples  
485 were incubated at room temperature for 2 h on a rotating wheel after which beads were  
486 precipitated using a magnetic sample rack. The supernatant was removed, and beads washed  
487 three times with NP-40 extraction buffer followed by three washes with extraction buffer

488 lacking detergent. Washed beads were then resuspended in trypsinisation buffer (50 mM  
489 ammonium bicarbonate, 40 mM 2-chloroacetamide and 10 mM Tris-(2-carboxyethyl)  
490 phosphine hydrochloride) and samples reduced and alkylated by heated to 70°C for 5 minutes.  
491 250 ng of trypsin was added to the samples and heated at 37°C overnight with gentle agitation  
492 followed by filtration using a 0.22 µm Costar® Spin-X® centrifuge tube filter (Sigma). Samples  
493 were then run on a LTQ-Orbitrap-Velos mass spectrometer (Thermo Scientific). Search engines,  
494 Mascot (<http://www.matrixscience.com/>) and MaxQuant (<https://www.maxquant.org/>) were  
495 used for mass spectrometry data analysis. The PlasmoDB database was used for protein  
496 annotation. Peptide and proteins having minimum threshold of 95% were used for further  
497 proteomic analysis and peptide traces analysed using Scaffold4.

498

#### 499 **Measurement of hemozoin content**

500 A culture of 5% parasitemia 1 h synchronised rings stage CDC50C parasites were treated at 1 h  
501 post invasion with DMSO or RAP (100 nM) and then left to develop until the early trophozoite  
502 stage at 36 h post-invasion. Parasites were then harvested by saponin lysis and then processed  
503 similarly to a reported method (46) to purify hemozoin. Pellets were then de-polymerised in  
504 0.5 ml of 0.2 M NaOH solution and the resultant heme content measured by absorbance at 410  
505 nm in a Spectramax iD5 plate reader.

506

#### 507 **Measurement of intracellular cyclic nucleotide levels**



508 cAMP and cGMP in mature CDC50B schizonts were measured using enzyme-linked  
509 immunosorbent assay (ELISA)-based high-sensitivity direct cAMP and cGMP colorimetric assay  
510 kits (Enzo Life Sciences). Mature schizonts were Percoll purified from RAP- or DMSO-treated  
511 CDC50B-HA:loxP cultures followed by resuspension and lysis in 0.1 M HCl solution. Samples  
512 were pelleted at 10,000 × g, and the supernatant was collected and stored at –80°C until  
513 required. To perform the ELISA, samples and standards were acetylated to improve detection  
514 sensitivity according to the manufacturer’s instructions. Standards and samples were run in  
515 triplicate on the same plate and absorbance at 410 nm read with a Spectramax iD5 plate  
516 reader. The standard was fitted to a sigmoidal curve and used to determine cyclic nucleotide  
517 concentrations in parasite samples. Remaining supernatant was assayed for protein  
518 concentration by a Bradford assay kit (Pierce). cGMP and cAMP reading were normalised by  
519 protein content from the Bradford assay.

520

## 521 **Acknowledgments**

522 We would like to thank the following for the kind gifts of antibodies used in this work: Daniel  
523 Goldberg (Washington University, St. Louis, MO) for the mouse anti-plasmeprin V mAb;  
524 Claudia Daubenberger (SwissTPH, Basel, Switzerland) for the mouse anti-GAPDH mAb;  
525 Christiaan van Ooij (LSHTM, London, UK) for the rabbit anti-EXP2 polyclonal antibody.

526

## 527 **Author contributions**

528 All experiments were designed and carried out by AP. MJB and DAB supervised the work overall  
529 and SDN designed and provided plasmids for CRISPR editing of GC $\alpha$ .

530

531 **Funding:** This work was supported by Wellcome Trust grant 106240/Z/14/Z (to DAB),  
532 Wellcome Trust grant 106239/Z/14/A (to MJB), and Wellcome ISSF2 funding to the London  
533 School of Hygiene & Tropical Medicine. For the purpose of Open Access, the author has applied  
534 a CC BY public copyright licence to any Author Accepted Manuscript version arising from this  
535 submission. This work was also supported by funding to MJB from the Francis Crick Institute  
536 (<https://www.crick.ac.uk/>), which receives its core funding from Cancer Research UK  
537 (FC001043; <https://www.cancerresearchuk.org>), the UK Medical Research Council (FC001043;  
538 <https://www.mrc.ac.uk/>), and the Wellcome Trust (FC001043; <https://wellcome.ac.uk/>).

### 539 **List of abbreviations**

540 ATP2 - phospholipid-transporting ATPase 2

541 ATP7 - ATPase seven

542 cAMP - cyclic AMP

543 Cas9 - CRISPR associated protein nine

544 CDC50 - cell division control protein 50

545 cGMP - cyclic GMP

546 CRISPR - clustered regularly interspersed short palindromic repeats

- 547 DiCre - dimerisable Cre-recombinase
- 548 DMSO - dimethyl sulfoxide
- 549 ERD2 - endoplasmic reticulum retention defective two
- 550 EXP2 - exported protein two
- 551 GAPDH - glyceraldehyde three phosphate dehydrogenase
- 552 GC $\alpha$  - guanylyl cyclase alpha
- 553 GC $\beta$  - guanylyl cyclase beta
- 554 HA3 - triple hemagglutinin epitope tag
- 555 IFA – immunofluorescence assay
- 556 mCherry - monomeric cherry fluorescent protein
- 557 MMV - Medicines for Malaria Venture
- 558 NBD-PC - nitro-benzoxadiazol phosphatidylcholine
- 559 NBD-PE - nitro-benzoxadiazol phosphatidylethanolamine
- 560 NBD-PS - nitro-benzoxadiazol phosphatidylserine
- 561 P4-ATPase - type IV ATPases
- 562 PC - phosphatidylcholine
- 563 PE - phosphatidylethanolamine

- 564 PMV - plasmepsin five
- 565 PS - phosphatidylserine
- 566 RAP - rapamycin
- 567 RFP - red fluorescent protein
- 568 SBP - skeleton binding protein
- 569 SERA5 - serine repeat antigen 5
- 570 sgRNA- single guide RNA
- 571 SLI - selection-linked integration

572

573 References

- 574 1. World malaria report 2021.
- 575 2. Balikagala B, Fukuda N, Ikeda M, Katuro OT, Tachibana S-I, Yamauchi M, Opio W, Emoto  
576 S, Anywar DA, Kimura E, Palacpac NMQ, Odongo-Aginya EI, Ogwang M, Horii T, Mita T.  
577 2021. Evidence of Artemisinin-Resistant Malaria in Africa. *N Engl J Med* 385:1163–1171.
- 578 3. Bannister L, Mitchell G. 2003. The ins, outs and roundabouts of malaria. *Trends Parasitol*  
579 19:209–213.
- 580 4. Baillie GS, Tejeda GS, Kelly MP. 2019. Therapeutic targeting of 3',5'-cyclic nucleotide  
581 phosphodiesterases: inhibition and beyond. *Nat Rev Drug Discov* 18:770–796.

- 582 5. Scott JD. 1991. Cyclic nucleotide-dependent protein kinases. *Pharmacol Ther* 50:123–  
583 145.
- 584 6. Conti M, Beavo J. 2007. Biochemistry and physiology of cyclic nucleotide  
585 phosphodiesterases: essential components in cyclic nucleotide signaling. *Annu Rev*  
586 *Biochem* 76:481–511.
- 587 7. Baker DA, Drought LG, Flueck C, Nofal SD, Patel A, Penzo M, Walker EM. 2017. Cyclic  
588 nucleotide signalling in malaria parasites. *Open Biol* 7.
- 589 8. Collins CR, Hackett F, Strath M, Penzo M, Withers-Martinez C, Baker DA, Blackman MJ.  
590 2013. Malaria parasite cGMP-dependent protein kinase regulates blood stage merozoite  
591 secretory organelle discharge and egress. *PLoS Pathog* 9.
- 592 9. Taylor CJ, McRobert L, Baker DA. 2008. Disruption of a *Plasmodium falciparum* cyclic  
593 nucleotide phosphodiesterase gene causes aberrant gametogenesis. *Mol Microbiol*  
594 69:110–118.
- 595 10. McRobert L, Taylor CJ, Deng W, Fivelman QL, Cummings RM, Polley SD, Billker O, Baker  
596 DA. 2008. Gametogenesis in malaria parasites is mediated by the cGMP-dependent  
597 protein kinase. *PLoS Biol* 6:1243–1252.
- 598 11. Falae A, Combe A, Amaladoss A, Carvalho T, Menard R, Bhanot P. 2010. Role of  
599 *Plasmodium berghei* cGMP-dependent protein kinase in late liver stage development. *J*  
600 *Biol Chem* 285:3282–3288.
- 601 12. Govindasamy K, Jebiwott S, Jaijyan DK, Davidow A, Ojo KK, Van Voorhis WC, Brochet M,

- 602 Billker O, Bhanot P. 2016. Invasion of hepatocytes by Plasmodium sporozoites requires  
603 cGMP-dependent protein kinase and calcium dependent protein kinase 4. Mol Microbiol  
604 102:349–363.
- 605 13. Ishino T, Orito Y, Chinzei Y, Yuda M. 2006. A calcium-dependent protein kinase regulates  
606 Plasmodium ookinete access to the midgut epithelial cell. Mol Microbiol 59:1175–1184.
- 607 14. Moon RW, Taylor CJ, Bex C, Schepers R, Goulding D, Janse CJ, Waters AP, Baker DA,  
608 Billker O. 2009. A cyclic GMP signalling module that regulates gliding motility in a malaria  
609 parasite. PLoS Pathog 5.
- 610 15. Ono T, Cabrita-Santos L, Leitao R, Bettiol E, Purcell LA, Diaz-Pulido O, Andrews LB,  
611 Tadakuma T, Bhanot P, Mota MM, Rodriguez A. 2008. Adenylyl cyclase alpha and cAMP  
612 signaling mediate Plasmodium sporozoite apical regulated exocytosis and hepatocyte  
613 infection. PLoS Pathog 4.
- 614 16. Ramdani G, Naissant B, Thompson E, Breil F, Lorthiois A, Dupuy F, Cummings R, Duffier Y,  
615 Corbett Y, Mercereau-Puijalon O, Vernick K, Taramelli D, Baker D a, Langsley G, Lavazec  
616 C. 2015. cAMP-Signalling Regulates Gametocyte-Infected Erythrocyte Deformability  
617 Required for Malaria Parasite Transmission. PLoS Pathog 11:e1004815.
- 618 17. Patel A, Perrin AJ, Flynn HR, Bisson C, Withers-Martinez C, Treeck M, Flueck C, Nicastro G,  
619 Martin SR, Ramos A, Gilberger TW, Snijders AP, Blackman MJ, Baker DA. 2019. Cyclic  
620 AMP signalling controls key components of malaria parasite host cell invasion machinery.  
621 PLoS Biol 17.

- 622 18. Nofal SD, Patel A, Blackman MJ, Flueck C, Baker DA. 2021. Plasmodium falciparum  
623 Guanylyl Cyclase-Alpha and the Activity of Its Appended P4-ATPase Domain Are Essential  
624 for cGMP Synthesis and Blood-Stage Egress. *MBio* 12:1–19.
- 625 19. Carucci DJ, Witney a a, Muhia DK, Warhurst DC, Schaap P, Meima M, Li JL, Taylor MC,  
626 Kelly JM, Baker D a. 2000. Guanylyl cyclase activity associated with putative bifunctional  
627 integral membrane proteins in Plasmodium falciparum. *J Biol Chem* 275:22147–56.
- 628 20. Gao H, Yang Z, Wang X, Qian P, Hong R, Chen X, Su X zhuan, Cui H, Yuan J. 2018. ISP1-  
629 Anchored Polarization of GCβ/CDC50A Complex Initiates Malaria Ookinete Gliding  
630 Motility. *Curr Biol* 28:2763-2776.e6.
- 631 21. Best JT, Xu P, Graham TR. 2019. Phospholipid flippases in membrane remodeling and  
632 transport carrier biogenesis. *Curr Opin Cell Biol* 59:8–15.
- 633 22. Bisio H, Lunghi M, Brochet M, Soldati-Favre D. 2019. Phosphatidic acid governs natural  
634 egress in *Toxoplasma gondii* via a guanylate cyclase receptor platform. *Nat Microbiol*  
635 4:420–428.
- 636 23. Brown KM, Sibley LD. 2018. Essential cGMP Signaling in *Toxoplasma* Is Initiated by a  
637 Hybrid P-Type ATPase-Guanylate Cyclase. *Cell Host Microbe* 24:804-816.e6.
- 638 24. Yang L, Uboldi AD, Seizova S, Wilde ML, Coffey MJ, Katris NJ, Yamaro-Botté Y, Kocan M,  
639 Bathgate RAD, Stewart RJ, McConville MJ, Thompson PE, Botté CY, Tonkin CJ. 2019. An  
640 apically located hybrid guanylate cyclase-ATPase is critical for the initiation of Ca<sup>2+</sup>  
641 signaling and motility in *Toxoplasma gondii*. *J Biol Chem* 294:8959–8972.

- 642 25. Günay-Esiyok O, Scheib U, Noll M, Gupta N. 2019. An unusual and vital protein with  
643 guanylate cyclase and P4-ATPase domains in a pathogenic protist. *Life Sci alliance* 2.
- 644 26. Saito K, Fujimura-Kamada K, Futura N, Kato U, Umeda M, Tanaka K. 2004. Cdc50p, a  
645 protein required for polarized growth, associates with the Drs2p P-type ATPase  
646 implicated in phospholipid translocation in *Saccharomyces cerevisiae*. *Mol Biol Cell*  
647 15:3418–3432.
- 648 27. Chen S, Wang J, Muthusamy BP, Liu K, Zare S, Andersen RJ, Graham TR. 2006. Roles for  
649 the Drs2p-Cdc50p complex in protein transport and phosphatidylserine asymmetry of  
650 the yeast plasma membrane. *Traffic* 7:1503–1517.
- 651 28. Timcenko M, Lyons JA, Janulienė D, Ulstrup JJ, Dieudonné T, Montigny C, Ash MR, Karlsen  
652 JL, Boesen T, Kühlbrandt W, Lenoir G, Moeller A, Nissen P. 2019. Structure and  
653 autoregulation of a P4-ATPase lipid flippase. *Nature* 571:366–370.
- 654 29. Hiraizumi M, Yamashita K, Nishizawa T, Nureki O. 2019. Cryo-EM structures capture the  
655 transport cycle of the P4-ATPase flippase. *Science* 365:1149–1155.
- 656 30. Lenoir G, Williamson P, Puts CF, Holthuis JCM. 2009. Cdc50p plays a vital role in the  
657 ATPase reaction cycle of the putative aminophospholipid transporter Drs2p. *J Biol Chem*  
658 284:17956–17967.
- 659 31. Bryde S, Hennrich H, Verhulst PM, Devaux PF, Lenoir G, Holthuis JCM. 2010. CDC50  
660 proteins are critical components of the human class-1 P4-ATPase transport machinery. *J*  
661 *Biol Chem* 285:40562–40572.



- 662 32. Collins CR, Das S, Wong EH, Andenmatten N, Stallmach R, Hackett F, Herman JP, Müller S,  
663 Meissner M, Blackman MJ. 2013. Robust inducible Cre recombinase activity in the human  
664 malaria parasite *Plasmodium falciparum* enables efficient gene deletion within a single  
665 asexual erythrocytic growth cycle. *Mol Microbiol* 88:687–701.
- 666 33. Knuepfer E, Napiorkowska M, Van Ooij C, Holder AA. 2017. Generating conditional gene  
667 knockouts in *Plasmodium* - a toolkit to produce stable DiCre recombinase-expressing  
668 parasite lines using CRISPR/Cas9. *Sci Rep* 7.
- 669 34. Toenhake CG, Fraschka SAK, Vijayabaskar MS, Westhead DR, van Heeringen SJ, Bártfai R.  
670 2018. Chromatin Accessibility-Based Characterization of the Gene Regulatory Network  
671 Underlying *Plasmodium falciparum* Blood-Stage Development. *Cell Host Microbe* 23:557-  
672 569.e9.
- 673 35. Yeoh S, O'Donnell RA, Koussis K, Dluzewski AR, Ansell KH, Osborne SA, Hackett F,  
674 Withers-Martinez C, Mitchell GH, Bannister LH, Bryans JS, Kettleborough CA, Blackman  
675 MJ. 2007. Subcellular discharge of a serine protease mediates release of invasive malaria  
676 parasites from host erythrocytes. *Cell* 131:1072–1083.
- 677 36. Salowe SP, Wiltsie J, Liberator PA, Donald RGK. 2002. The role of a parasite-specific  
678 allosteric site in the distinctive activation behavior of *Eimeria tenella* cGMP-dependent  
679 protein kinase. *Biochemistry* 41:4385–4391.
- 680 37. Paul AS, Miliu A, Paulo JA, Goldberg JM, Bonilla AM, Berry L, Seveno M, Braun-Breton C,  
681 Kosber AL, Elsworth B, Arriola JSN, Lebrun M, Gygi SP, Lamarque MH, Duraisingh MT.  
682 2020. Co-option of *Plasmodium falciparum* PP1 for egress from host erythrocytes. *Nat*

- 683 Commun 11.
- 684 38. Poulsen LR, López-Marqués RL, Pedas PR, McDowell SC, Brown E, Kunze R, Harper JF,  
685 Pomorski TG, Palmgren M. 2015. A phospholipid uptake system in the model plant  
686 *Arabidopsis thaliana*. *Nat Commun* 6.
- 687 39. Pomorski T, Lombardi R, Riezman H, Devaux PF, Van Meer G, Holthuis JCM. 2003. Drs2p-  
688 related P-type ATPases Dnf1p and Dnf2p are required for phospholipid translocation  
689 across the yeast plasma membrane and serve a role in endocytosis. *Mol Biol Cell*  
690 14:1240–1254.
- 691 40. Pomorski T, Holthuis JCM, Hermann A, van Meer G. 2004. Tracking down lipid flippases  
692 and their biological functions. *J Cell Sci* 117:805–813.
- 693 41. Poulsen LR, López-Marqués RL, McDowell SC, Okkeri J, Licht D, Schulz A, Pomorski T,  
694 Harper JF, Palmgren MG. 2008. The *Arabidopsis* P4-ATPase ALA3 localizes to the golgi  
695 and requires a beta-subunit to function in lipid translocation and secretory vesicle  
696 formation. *Plant Cell* 20:658–676.
- 697 42. Harsay E, Bretscher A. 1995. Parallel secretory pathways to the cell surface in yeast. *J Cell*  
698 *Biol* 131:297–310.
- 699 43. Pomorski T, Lombardi R, Riezman H, Devaux PF, Van Meer G, Holthuis JCM. 2003. Drs2p-  
700 related P-type ATPases Dnf1p and Dnf2p are required for phospholipid translocation  
701 across the yeast plasma membrane and serve a role in endocytosis. *Mol Biol Cell*  
702 14:1240–1254.

- 703 44. Gall WE, Geething NC, Hua Z, Ingram MF, Liu K, Chen SI, Graham TR. 2002. Drs2p-  
704 dependent formation of exocytic clathrin-coated vesicles in vivo. *Curr Biol* 12:1623–1627.
- 705 45. Elsworth B, Matthews K, Nie CQ, Kalanon M, Charnaud SC, Sanders PR, Chisholm SA,  
706 Counihan NA, Shaw PJ, Pino P, Chan JA, Azevedo MF, Rogerson SJ, Beeson JG, Crabb BS,  
707 Gilson PR, De Koning-Ward TF. 2014. PTEX is an essential nexus for protein export in  
708 malaria parasites. *Nature* 511:587–591.
- 709 46. Coban C, Ishii KJ, Sullivan DJ, Kumar N. 2002. Purified malaria pigment (hemozoin)  
710 enhances dendritic cell maturation and modulates the isotype of antibodies induced by a  
711 DNA vaccine. *Infect Immun* 70:3939–3943.
- 712 47. Bushkin GG, Ratner DM, Cui J, Banerjee S, Duraisingh MT, Jennings C V., Dvorin JD,  
713 Gubbels MJ, Robertson SD, Steffen M, O’Keefe BR, Robbins PW, Samuelson J. 2010.  
714 Suggestive evidence for Darwinian Selection against asparagine-linked glycans of  
715 *Plasmodium falciparum* and *Toxoplasma gondii*. *Eukaryot Cell* 9:228–241.
- 716 48. Lamy A, Macarini-Bruzaferro E, Dieudonné T, Perálvarez-Marín A, Lenoir G, Montigny C,  
717 le Maire M, Vázquez-Ibar JL. 2021. ATP2, The essential P4-ATPase of malaria parasites,  
718 catalyzes lipid-stimulated ATP hydrolysis in complex with a Cdc50  $\beta$ -subunit. *Emerg*  
719 *Microbes Infect* 10:132–147.
- 720 49. Zhang M, Wang C, Otto TD, Oberstaller J, Liao X, Adapa SR, Udenze K, Bronner IF,  
721 Casandra D, Mayho M, Brown J, Li S, Swanson J, Rayner JC, Jiang RHY, Adams JH. 2018.  
722 Uncovering the essential genes of the human malaria parasite *Plasmodium falciparum* by  
723 saturation mutagenesis. *Science* 360.

- 724 50. Kenthirapalan S, Waters AP, Matuschewski K, Kooij TWA. 2016. Functional profiles of  
725 orphan membrane transporters in the life cycle of the malaria parasite. *Nat Commun*  
726 7:10519.
- 727 51. Cowell AN, Istvan ES, Lukens AK, Gomez-Lorenzo MG, Vanaerschot M, Sakata-Kato T,  
728 Flannery EL, Magistrado P, Owen E, Abraham M, La Monte G, Painter HJ, Williams RM,  
729 Franco V, Linares M, Arriaga I, Bopp S, Corey VC, Gnädig NF, Coburn-Flynn O, Reimer C,  
730 Gupta P, Murithi JM, Moura PA, Fuchs O, Sasaki E, Kim SW, Teng CH, Wang LT, Akidil A,  
731 Adjalley S, Willis PA, Siegel D, Tanaseichuk O, Zhong Y, Zhou Y, Llinás M, Otilie S, Gamo  
732 FJ, Lee MCS, Goldberg DE, Fidock DA, Wirth DF, Winzeler EA. 2018. Mapping the malaria  
733 parasite druggable genome by using in vitro evolution and chemogenomics. *Science*  
734 359:191–199.
- 735 52. Goldberg DE. 1993. Hemoglobin degradation in Plasmodium-infected red blood cells.  
736 *Semin Cell Biol* 4:355–361.
- 737 53. Xie SC, Ralph SA, Tilley L. 2020. K13, the Cytostome, and Artemisinin Resistance. *Trends*  
738 *Parasitol* 36:533–544.
- 739 54. Yang Z, Shi Y, Cui H, Yang S, Gao H, Yuan J. 2021. A malaria parasite phospholipid flippase  
740 safeguards midgut traversal of ookinetes for mosquito transmission. *Sci Adv* 7.
- 741 55. Bisio H, Krishnan A, Marq J-B, Soldati-Favre D. 2021. Toxoplasma gondii  
742 phosphatidylserine flippase complex ATP2B-CDC50.4 critically participates in microneme  
743 exocytosis. bioRxiv 2021.11.25.470034.

- 744 56. Harris PK, Yeoh S, Dluzewski AR, O'Donnell RA, Withers-Martinez C, Hackett F, Bannister  
745 LH, Mitchell GH, Blackman MJ. 2005. Molecular identification of a malaria merozoite  
746 surface sheddase. *PLoS Pathog* 1:0241–0251.
- 747 57. Jones ML, Das S, Belda H, Collins CR, Blackman MJ, Treeck M. 2016. A versatile strategy  
748 for rapid conditional genome engineering using loxP sites in a small synthetic intron in  
749 *Plasmodium falciparum*. *Sci Rep* 6:21800.
- 750 58. Birnbaum J, Flemming S, Reichard N, Soares AB, Mesén-Ramírez P, Jonscher E, Bergmann  
751 B, Spielmann T. 2017. A genetic system to study *Plasmodium falciparum* protein function.  
752 *Nat Methods* 14:450–456.
- 753 59. Krogh A, Larsson B, Von Heijne G, Sonnhammer ELL. 2001. Predicting transmembrane  
754 protein topology with a hidden Markov model: application to complete genomes. *J Mol*  
755 *Biol* 305:567–580.

756

## 757 Figure legends

758 (1A) Representation of the three CDC50 proteins in *P. falciparum* displayed from N- to C-  
759 terminus in a relative scale. White boxes indicate transmembrane helices (TMDs) as predicted  
760 by the TMHMM server (59). Arrows indicate the point at which the protein products are  
761 truncated when the corresponding modified locus is excised in transgenically-modified parasite  
762 lines. For CDC50A this is from Phe341, for CDC50B His235 and CDC50C from Glu383.

763

764 (1B) Schematic representation of the SLI strategy (58) used to produce the three CDC50 DiCre  
765 lines and resultant RAP-induced disruption of the modified genes. Double-headed arrows  
766 represent the regions amplified by PCR in (1C). Red arrowheads represent *loxP* sites, yellow  
767 lollipops represent translational stop codons, white boxes indicate TMDs and light blue boxes  
768 indicate regions of re-codonised sequence (R.R.).

769

770 (1C) Diagnostic PCR analysis of gDNA from transgenic CDC50 parasite lines verifying successful  
771 modification of target loci by SLI to produce CDC50A-HA:loxP, CDC50B-HA:loxP and CDC50C-  
772 HA:loxP. Efficient excision of 'floxed' sequences is observed upon treatment with RAP for all  
773 lines. Track C represents amplification of a control locus (PKAc) to check gDNA integrity. PCRs 1-  
774 4 are represented in the schematic locus in panel 1B. PCR 1 screens for the WT locus, PCR 2 for  
775 5' integration, PCR 3 for 3' integration and PCR 4 for the excision of the 'floxed' sequence. See  
776 Table 1 for sequences of all primers used for PCR. Sizes for expected amplification products are  
777 as follows: C, control locus (primers 16 and 17) 1642b.p. CDC50A; PCR 1 (primers 21 and 22)  
778 1842b.p, PCR2 (primers 21 and 18) 1613b.p, PCR3 (primers 20 and 22) 1670b.p and PCR 4  
779 (primers 21 and 19) 2863b.p (DMSO), 1169b.p (RAP). CDC50B; PCR 1 (primers 23 and 24)  
780 1423b.p, PCR2 (primers 23 and 18) 1457b.p, PCR3 (primers 20 and 24) 1321b.p and PCR 4  
781 (primers 23 and 19) 2707b.p (DMSO), 1010b.p (RAP). CDC50C; PCR 1 (primers 25 and 26)  
782 1369b.p, PCR2 (primers 25 and 18) 1602b.p, PCR3 (primers 20 and 26) 1172b.p and PCR 4  
783 (primers 25 and 19) 2852b.p (DMSO), 1369b.p (RAP).

784

785 (1D) Western blot analysis of expression (DMSO) and ablation (RAP) of CDC50A-HA, CDC50B-HA  
786 and CDC50C-HA from highly synchronous late stage schizonts in the respective transgenic  
787 parasite lines. Expression of GAPDH (PF3D7\_1462800) is shown as a loading control. No  
788 expression of CDC50A-HA was detected. Predicted molecular weights of CDC50B-HA, CDC50C-  
789 HA and GAPDH are indicated.

790

791 (1E) IFA analysis showing the diffuse peripheral localisation of CDC50B-HA and CDC50C-HA  
792 and the loss of expression upon RAP treatment. Over 99% of all RAP-treated CDC50B-HA:loxP  
793 and CDC50C-HA:loxP schizonts examined by IFA were diminished in HA expression in three  
794 independent experiments. Scale bar, 2  $\mu$ m.

795

796 (2A) Growth curves showing parasitaemia as measured by flow cytometry of CDC50A-HA:loxP,  
797 CDC50B-HA:loxP and CDC50C-HA:loxP parasites treated with DMSO (vehicle only control) or  
798 RAP. Means from 3 biological replicates are plotted. Error bars, SD.

799

800 (2B) Giemsa-stained thin blood films showing ring-stage parasites following egress of  
801 synchronous DMSO and RAP-treated CDC50C-HA:loxP schizonts. Ring formation occurs in RAP-  
802 treated CDC50C-HA parasites, but the parasites did not develop beyond the early trophozoite  
803 stage and eventually collapsed into small vacuoles.

804

805 (3A) Western blots demonstrate efficient immunoprecipitation (IP) of CDC50B-HA and CDC50C-  
806 HA from schizont extracts. Large black arrows indicate the predicted mass of each protein.  
807 Images are representative of 2 biological repeats.

808

809 (3B) Mass spectrometric identification of interacting partners of CDC50B and CDC50C. Volcano  
810 plot of P values versus the corresponding  $\log_2$  fold change in abundance compared to 3D7DiCre  
811 control samples (Fischer's exact test). Plotted by analysing proteins enriched through IP (panel  
812 3A) by mass spectrometry. Green line indicates  $p = -2\log_{10}$  and green dots represent peptides  
813 where  $p < -2\log_{10}$ . Peptides for GC $\alpha$  and ATP2 were enriched to  $p < -19\log_{10}$ .

814

815 (4A) Western blot analysis monitoring egress kinetics of DMSO- and RAP-treated CDC50B-  
816 HA:loxP schizonts. The diminished detection of the SERA5 p50 proteolytic fragment in culture  
817 supernatants of RAP-treated CDC50B-HA:loxP parasites indicates an impaired egress rate in the  
818 absence of CDC50B-HA. Lower panel left, histograms of DNA (SYBR green) staining of CDC50B  
819 DMSO- or RAP-treated schizonts. 10,000 cells were counted per treatment. Image  
820 representative of 3 biological repeats. Lower panel right, Giemsa-stained thin blood films of  
821 Percoll-purified CDC50B DMSO- and RAP-treated schizonts. No delay in schizont maturation is  
822 evident in RAP-treated parasites. Images representative of 3 biological repeats Scale bar, 5 $\mu$ m.

823



824 (4B) Western blot analysis of DMSO- and RAP-treated CDC50B-HA:loxP GC $\alpha$ -mCherry and  
825 control 3D7DiCre schizonts. The top panel shows a ~250 kDa fragment detected by an mCherry  
826 antibody that is absent in control (untagged) schizont lysates. The lower panel shows the same  
827 samples probed with an anti-HA antibody and an anti-GAPDH (PF3D7\_1462800) loading control  
828 antibody.

829

830 (4C) Immuno-precipitation of GC $\alpha$ -mCherry. Samples were loaded in duplicate and probed for  
831 mCherry (left panel) and HA epitope (left panel). \* denotes the ~40 kDa degradation product of  
832 GC $\alpha$ -mCherry observed after enrichment and boiling of the RFP-trap beads, suggesting that  
833 GC $\alpha$  was prone to proteolysis under the conditions used to promote binding or degrades when  
834 heated.

835

836 (4D) IFA showing the localisation of CDC50B and GC $\alpha$  mCherry in RAP and DMSO treated  
837 schizonts, top panel. Bottom panel, localisation of GC $\alpha$  mCherry and PMV (PF3D7\_1323500), an  
838 ER marker in RAP- and DMSO-treated schizonts. Scale bar, 2  $\mu$ m.

839

840 (4E) Quantification of cyclic nucleotide levels in tightly synchronised DMSO- and RAP-treated  
841 CDC50B mature schizonts by direct ELISA. Means are shown from 3 biological repeats plotted,  
842 error bars, SD. n.s = not significant, \* P<0.05, Student's t test.

843

844 (4F) Restoration of egress of RAP-treated CDC50B schizonts by treatment with zaprinast or PET-  
845 cGMP. Supernatant and pellet samples were taken at time point 0 post washing with RPMI to  
846 control for parasite numbers and egress. Samples were then taken at 60 min post incubation at  
847 37 °C. -C represents no treatment. Image is representative of 3 biological repeats.

848

849 (5A) Airyscan confocal analysis of IFAs of CDC50-C trophozoites co-localised with EXP2  
850 (PF3D7\_1471100) an exported PV protein, ERD2 a Golgi marker (PF3D7\_1353600) and PMV an  
851 ER marker (PF3D7\_1323500). Scale bar, 2 µm.

852

853 (5B) Flow cytometry analysis of fluorescent lipid uptake in live WT (DMSO) and CDC50C null  
854 (RAP) trophozoites labelled at 36 h post invasion. Histograms are overlaid each representing  
855 10,000 cells for each treatment. Cells were gated for DNA content and further for green  
856 fluorescence. No detectable shift in histogram curves was seen for each lipid in RAP-treated  
857 samples. Data are representative of one of three biological repeats, each of which showed the  
858 same outcome. Control samples, with no lipid added, were analysed to validate the gating  
859 protocol for lipid signal. Right panel shows examples of the stained cells visualised by  
860 fluorescence microscopy. Scale bar 2 µm.

861

862 (6A) IFA imaging of DMSO- and RAP-treated CDC50C-HA:loxP trophozoites fixed at 36 h post  
863 invasion indicates no defect in export of skeleton binding protein (SBP). Right, western blot  
864 showing absence of CDC50C-HA in RAP-treated trophozoites. Scale bar, 2  $\mu$ m.

865

866 (6B) Quantification of SBP puncta in DMSO- and RAP-treated CDC50C trophozoites. 66 parasites  
867 were counted from 2 individual biological replicates for SBP puncta in ImageJ. Mean values are  
868 plotted. Error bars, SD. n.s = not significant, Student's t test.

869

870 (6C) CDC50 null parasites produce smaller hemozoin crystals. Thin blood films were made from  
871 tightly synchronized DMSO- and RAP-treated CDC50C at 36 h post invasion. Inset, length of the  
872 hemozoin crystal (measurement 1) and parasite (measurement 2) were performed in ImageJ on  
873 imaged Giemsa-stained smears of DMSO- and RAP-treated CDC50C trophozoites. A ratio of  
874 crystal length to parasite length was derived by dividing measurement 1 by measurement 2. In  
875 total 46 parasites were measured from 3 independent biological repeats of CDC50B excision or  
876 control treatment. Mean values are plotted. Error bars, SD. \*  $P < 0.05$ , Student's t test.

877

878 (6D) Spectrophometric quantification of hemozoin content of CDC50C WT (DMSO) and null  
879 (RAP) trophozoites. Highly synchronised CDC50C ring stage cultures were treated with DMSO  
880 (control) or RAP. Cultures were then harvested at 36 h post invasion. Hemozoin was purified

881 using established methods (46) and quantified by absorbance at 410 nm. Means are plotted for  
882 3 independent biological repeats. Error bars, SD. n.s = not significant, \* P<0.05, Student's t test.

883

884 (6E) Western blot analysis of the haemoglobin content of saponin lysed CDC50-C WT and null  
885 trophozoites. Highly synchronised CDC50C ring stage cultures were treated with DMSO control  
886 or RAP. Cultures were then harvested at 36 h post invasion. Lysates were probed for the  
887 presence of CDC50-C by HA staining. Haemoglobin content was probed alongside GAPDH as a  
888 loading control. Data representative of 3 biological repeats.

889 **Table 1 – oligonucleotide primers used in this study**

|    | Name             | Sequence                                                                                                     |
|----|------------------|--------------------------------------------------------------------------------------------------------------|
| 1  | CDC50A 5HR F     | GCGGCCGCAGATCTCTCGAGCGATATTGGACACCAAATTGTTTA<br>CGAAGTTATTGTATATTATTTTTTTTATTTACCTACATGTGATTTATGTAATT        |
| 2  | CDC50A 5HR R     | CCATTTT<br>GTATATATATATATATTTATATATTTTATATTCTTTTAGATTTCTGGCTCATG                                             |
| 3  | CDC50A reco F    | AACGAAAAGTACAAGAACGCATTAACATG                                                                                |
| 4  | CDC50A reco R    | CAGATCCGCCTGAACCGGATCCCAAGAAGAAGATGTAATATAAG                                                                 |
| 5  | CDC50B 5HR F     | GCGGCCGCAGATCTCTCGAGTGAGTAATCTTAAAAATGACATGTTTATATC<br>CGAAGTTATTGTATATTATTTTTTTTATTTACCTTTATATAATTGTACATTTT |
| 6  | CDC50B 5HR R     | GAGGTG<br>GTATATATATATATATTTATATATTTTATATTCTTTTAGATCACATTTACTTTT                                             |
| 7  | CDC50B reco F    | GGATGGAGC                                                                                                    |
| 8  | CDC50B reco R    | CAGATCCGCCTGAACCGGATCCCTTGTTCGTAATGTTTCATC<br>GTATATATATATATATTTATATATTTTATATTCTTTTAGATGAGTGGAACGC           |
| 9  | CDC50C reco F    | TAAGAAAAGTTTC                                                                                                |
| 10 | CDC50C reco R    | CCGCCTGAACCGGATCCATGCAATGGACAGAAACACAACCTTC                                                                  |
| 11 | CDC50C 5HR F     | GATCTCTCGAGCCAGAGTACGAATTCATGAATGCTTTTAAACAACAAG<br>CGAAGTTATTGTATATTATTTTTTTTATTTACCTGCTGGCCATACGTTTTGAA    |
| 12 | CDC50C 5HR R     | G                                                                                                            |
| 13 | 5HR seq F        | CAGCTATGACCATGATTACGCC<br>CATTATACGAAGTTATTATATATGTATATATATATATATTTATATATTTTATA                              |
| 14 | Reco seq F       | TTC                                                                                                          |
| 16 | PKAc screen F    | GAAGGACAGTGATTCTAGTGAACAG                                                                                    |
| 17 | PKAc WT screen R | CAATTTCTTCATCAAATGTTTGCAATTGTTATC                                                                            |

|    |                    |                                             |
|----|--------------------|---------------------------------------------|
| 18 | HA R               | GCATAGTCAGGAACATCGTAAGG                     |
| 19 | Exi R              | CCGTTCAAATCTTCTTCAGAAATCAAC                 |
| 20 | 3' int F           | CAGCTATGACCATGATTACGCC                      |
| 21 | CDC50A 5' int F    | CTTTAGATTATGATGATAATTTTTTGAAGAAAAG          |
| 22 | CDC50A WT R        | GTGTATATTTAAAAATCAGGATTTTACTATATCCTC        |
| 23 | CDC50B 5' int F    | CAGTTATGTGTCTTCCCTTTGTATTATTTTG             |
| 24 | CDC50B WT R        | CTTTTGGTTATTAAATGTGTATCGAAATAATAC           |
| 25 | CDC50C 5' int F    | GTCGCAGTTCATGGGAAGG                         |
| 26 | CDC50C WT R        | GGGAATGGTCTGCTCCTGCT                        |
| 27 | T2A BSD amp F      | GCGGCATGGACGAGCTGTACAAGAGTGGAGAAGGAAGAGG    |
| 28 | T2A BSD amp R      | GTGTTGATGGTTTTGGGCTAGCTTAGCCCTCCCACACATAACC |
| 29 | Screen T2A F       | CGAGGACTACACCATCGTGG                        |
| 30 | GCtag WT F         | CTAAGAATATTCATTCCTACGATG                    |
| 31 | GCtag 3' int F     | CAATGGCACCTTTGTCTCAAG                       |
| 32 | GCtag 5' int F     | CATGGGCAAATGGTGTAGATG                       |
| 33 | GCtag 5' int R     | CCTCCATGTGCACCTTG                           |
| 34 | GCtag WT R         | CGAATGTTCGGAAAAATATTCATGTGC                 |
| 35 | p230p Int screen F | CTATATGGTATCCAAAACCTTTAAATTATATAGC          |
| 36 | p230p WT screen R  | GAGGAATTTTTAAATATGATATACCTTTATCATTAG        |

890

Figure 1

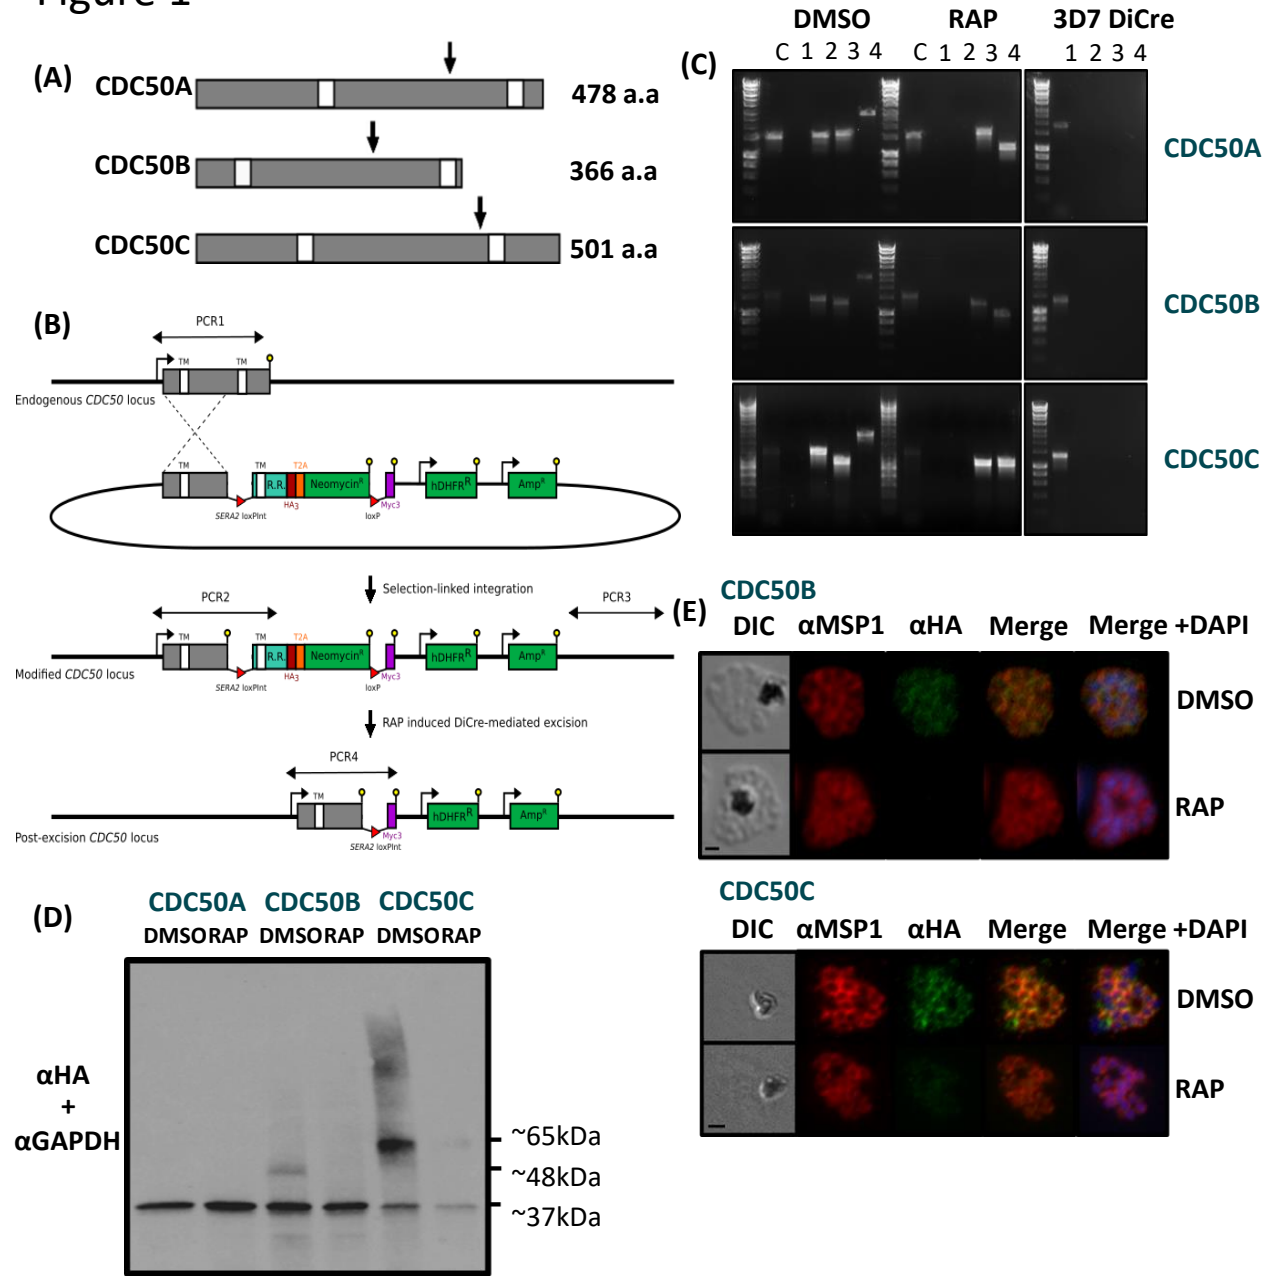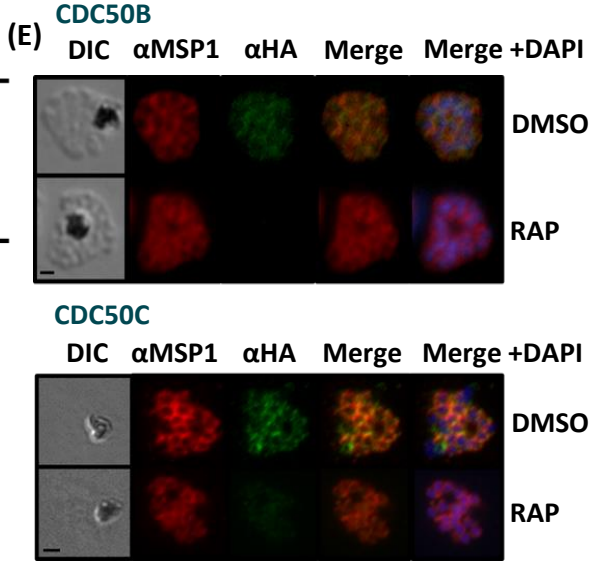

~65kDa  
 ~48kDa  
 ~37kDa

Figure 2

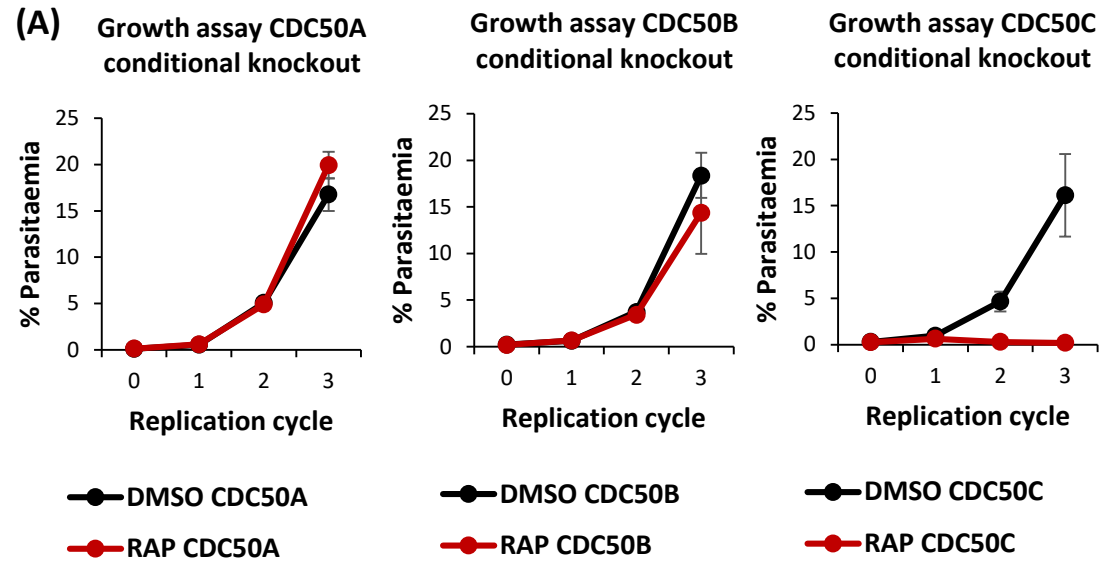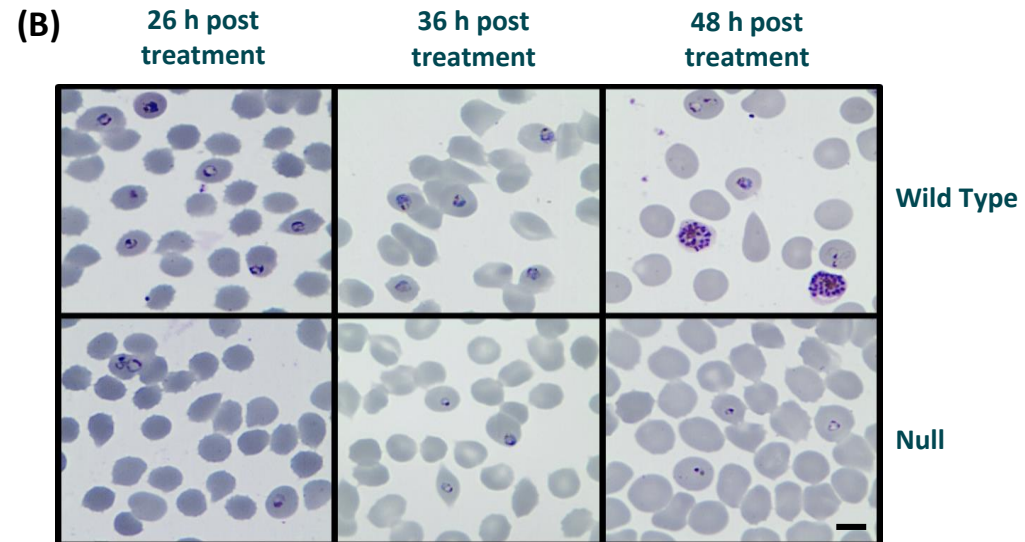

Figure 3

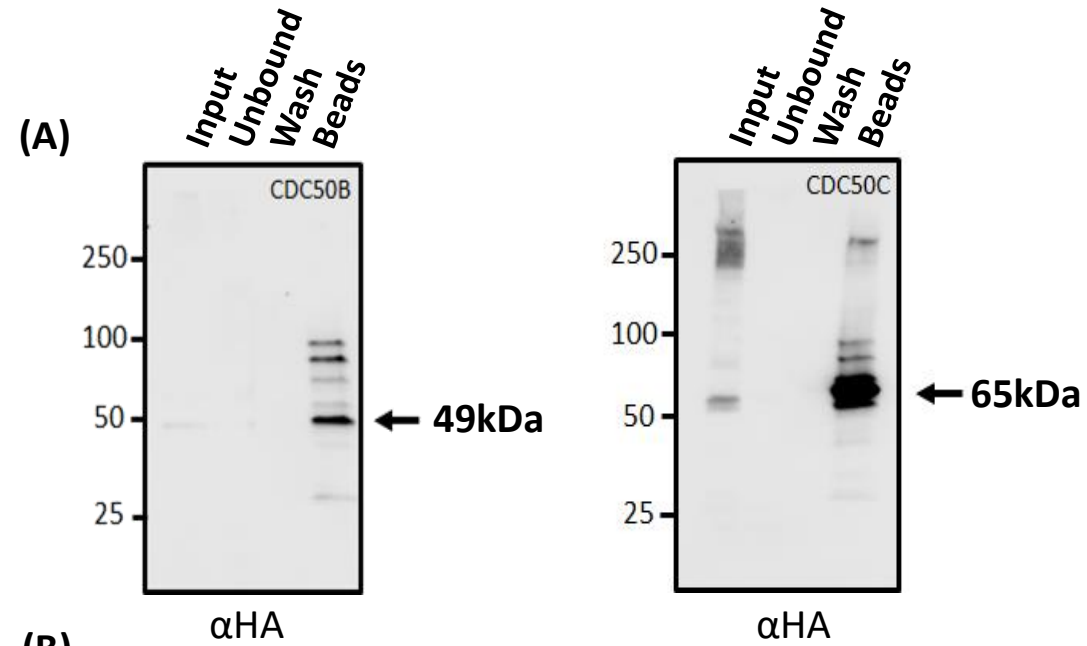

**(B)**

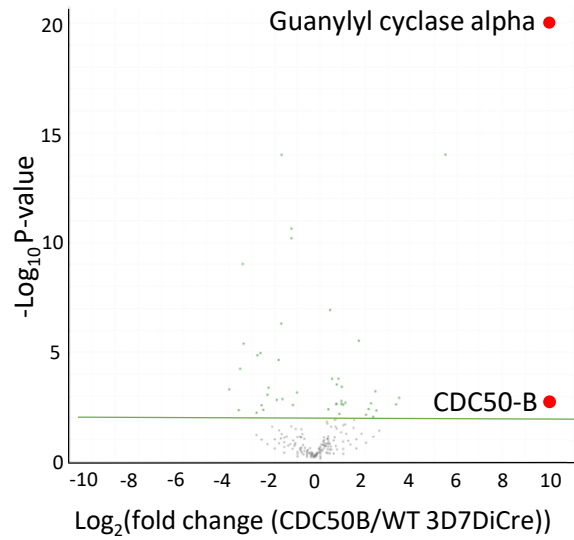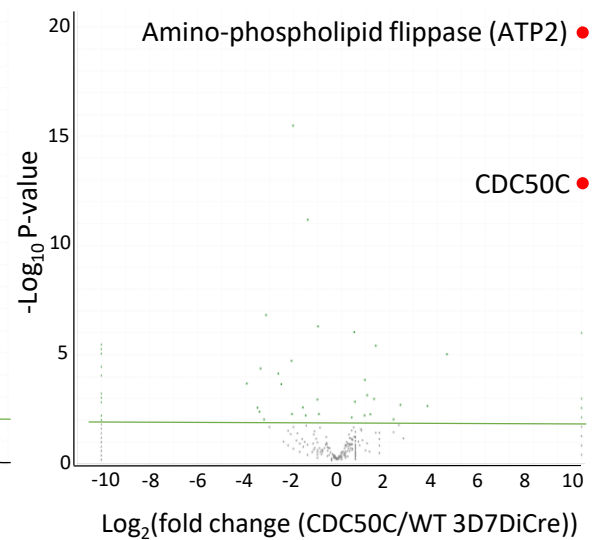



Figure 4

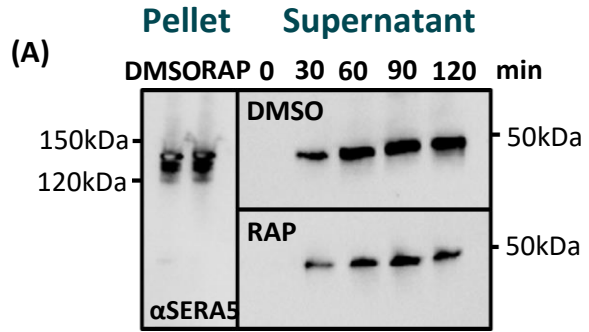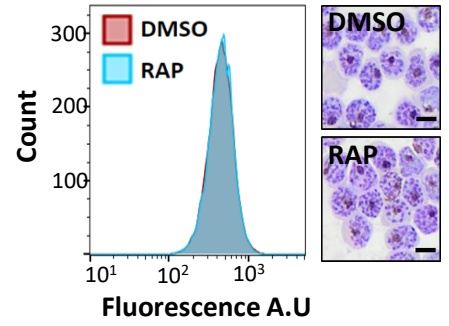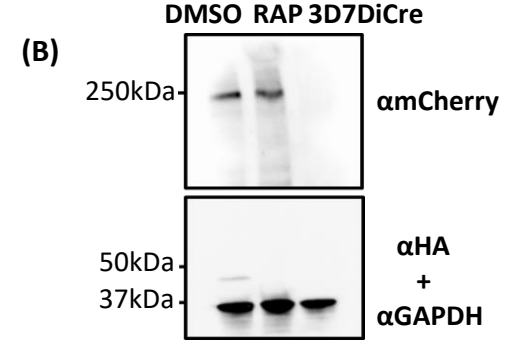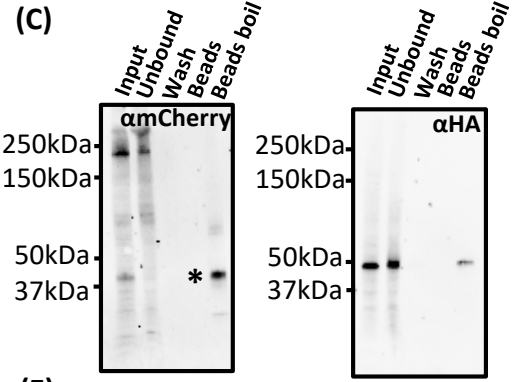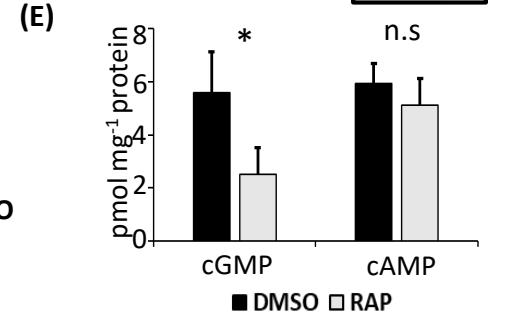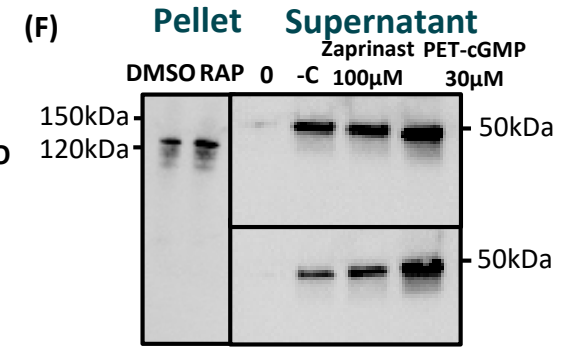

Figure 5

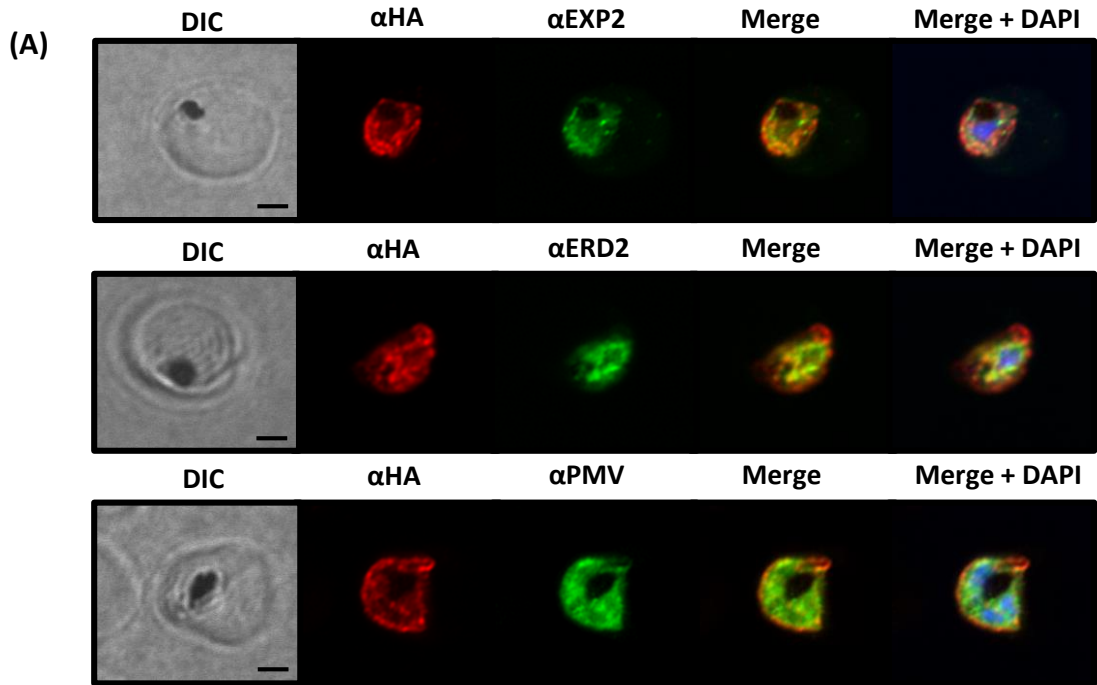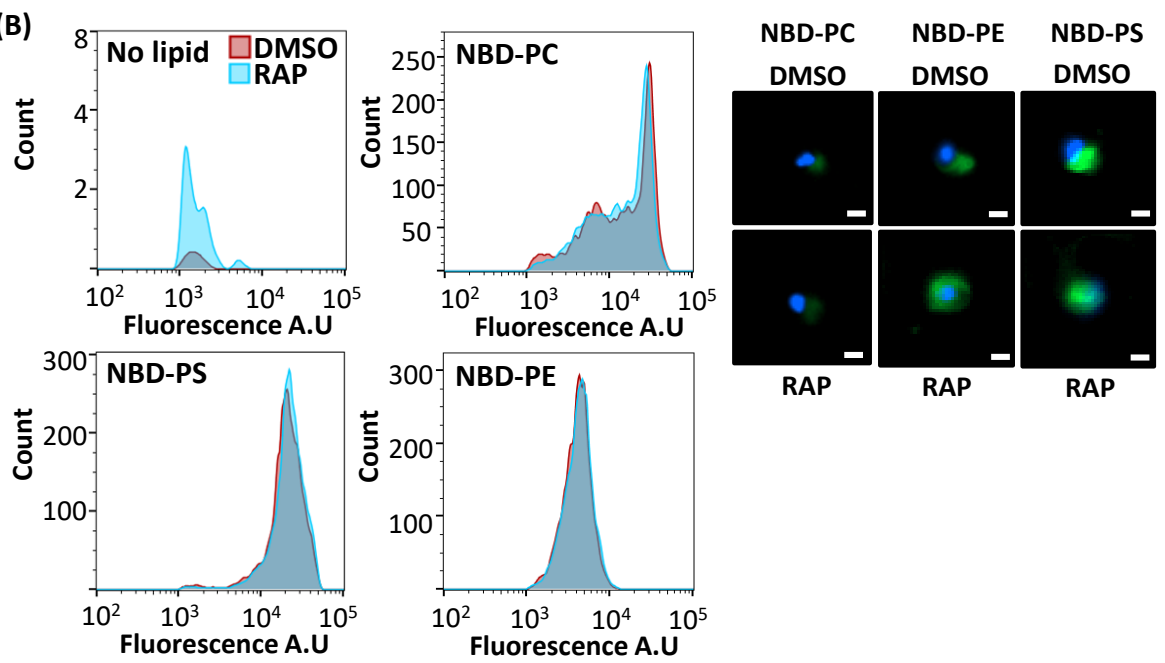

Figure 6

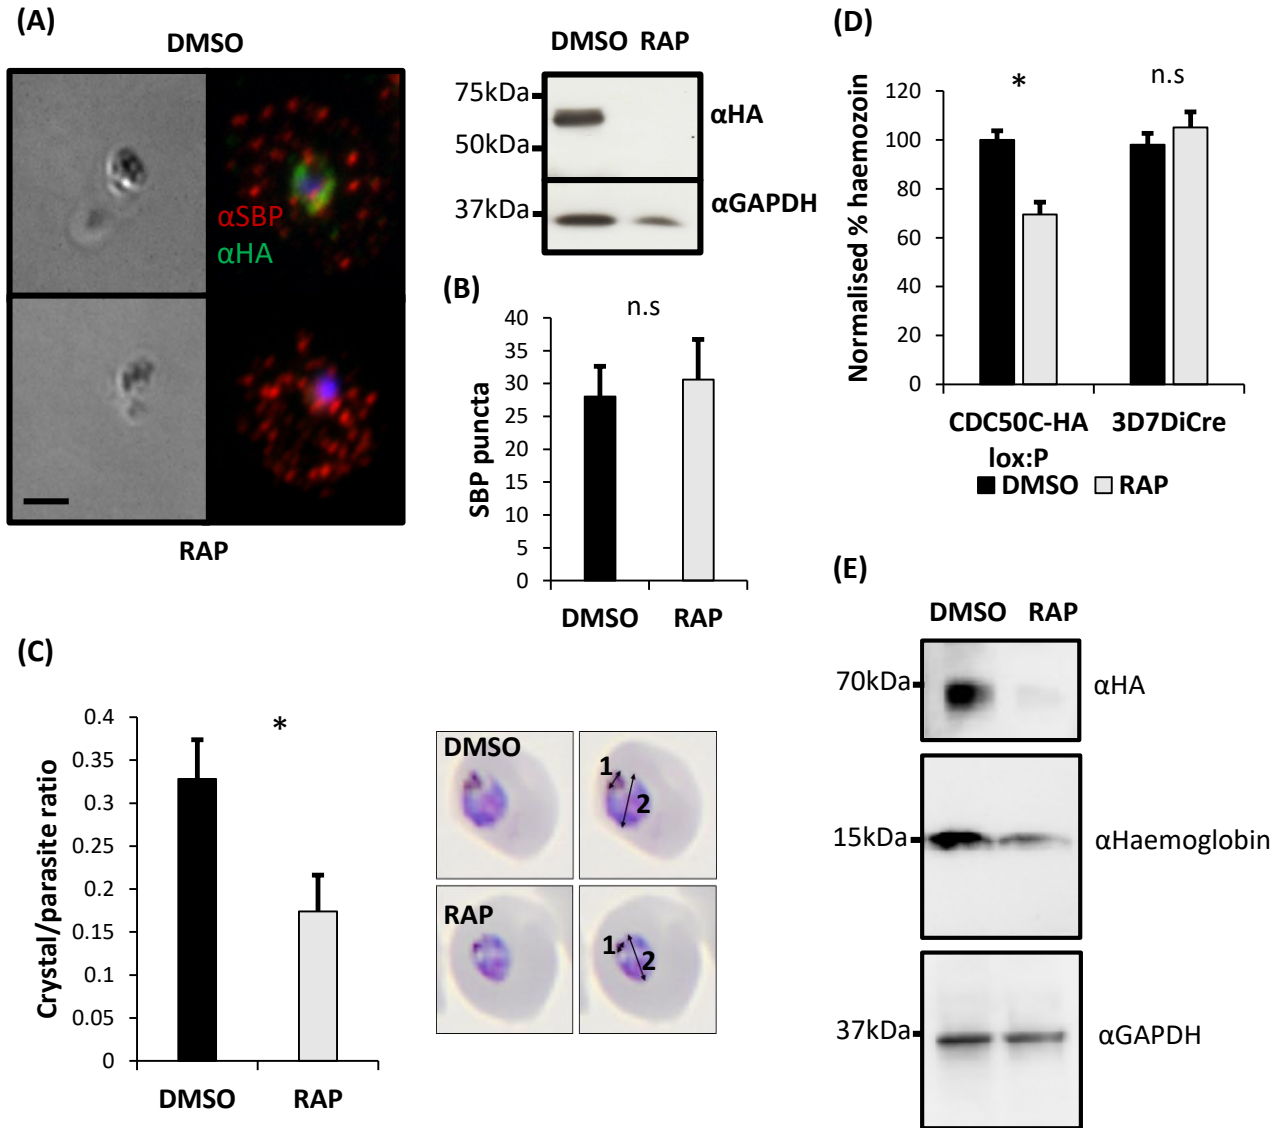

Source: http://biorxiv.org/content/10.1101/2022.01.18.476868v1.full.pdf
